# Supplementary material for: Subnational estimation of modern contraceptive prevalence in five sub-Saharan African countries: a Bayesian hierarchical approach
Source: PubMed Central journal article supplement (PMC6383248; doi:10.1186/s12889-019-6545-3), 2019-02-20
Supplement: 12889_2019_6545_MOESM1_ESM.pdf [file 12889_2019_6545_MOESM1_ESM.pdf]

Subnational estimation of modern contraceptive prevalence in five sub-Saharan African countries: a Bayesian hierarchical approach

Supplementary appendix

Part I: Documentation of Methods for Small Area Estimation

Part II: Detailed results

**Part I: Documentation of Methods for Small Area Estimation**

February 4, 2018

## Documentation of Methods for Small Area Estimation

### 1 Introduction

We provide a mid-level documentation of our analytic approaches to SAE. For background and technical details on Bayesian methods see Banerjee et al. (2014); Carlin and Louis (2009); Diggle (2014); Gelman et al. (2013). See the main manuscript for details on the analysis goals, data and results.

### 2 Woman-level, Bernoulli Modeling

Because some covariates vary over women within an EA, modeling must be Bernoulli (0/1 outcome) at the woman-specific level, with estimates 'rolled-up' to the EA level. To fix ideas, the following is for a single survey wave and so the subscript  $t$  in Section 3 is omitted.

Notation:

- $k = 1, \dots, K$ : EA index
- $i = 1, \dots, n_k$ , indexes women in EA  $k$ .
- $Y_{ik}$ : 0/1 indicator of woman  $i$  in region  $k$  (not using)/using birth control (or whatever other binary outcome is relevant).
- $[Y_{ik} | P_{ik}] \sim \text{Bernoulli}(P_{ik})$ .
- $\hat{P}_k = Y_{+k}/n_k$ : direct (unadjusted) estimate for EA  $k$ .
- $\mathbf{X}_{ik}$ : regressors for woman  $i$  in region  $k$ ,  $1 \times q$  row vector including the intercept. Note that some covariates may be EA-specific, but it's best to retain the  $(i, k)$  subscript for all covariates.
- $\beta$ : a  $q \times 1$  column vector of regression slopes.
- $P_{ik} = P(\mathbf{X}_{ik}\beta + u_k)$ : the true, underlying woman-specific probability for woman  $i$  in EA  $k$ , conditional on  $[\mathbf{X}_{ik}, \beta, U_k = u_k]$ .

$$\text{logit}\{P(\mathbf{X}_{ik}\beta + u_k)\} = \mathbf{X}_{ik}\beta + u_k$$

- $U_k \sim N(0, \tau)$ ;  $k = 1, \dots, K$  are the EA-specific, random effects (Note that  $U$  is indexed only by  $k$ )
  - The independence model sets  $U_k \text{ iid } N(0, \tau^2)$
  - A time-series model (e.g., AR1) induces between-wave correlation (see Section 3).
- The 'average logistic',  $\text{Avelogistic}_k = \sum_{i=1}^{n_k} P(\mathbf{X}_{ik}\beta + U_k)$ , integrated over the posterior distribution of  $\beta$  and over the prior distribution for the  $U_k$ . The avelogistic plays the role of a standard logistic regression, but brings in uncertainty in the slopes (frequentists should do this too!), and also integrates over the *prior distribution* of the  $U_k$ .

## 2.1 Using the MCMC samples

Both the population parameters and EA-specific MCMC outputs are relevant to in and out of sample inferences and predictions. Most programs, including BUGS and rstan, provide some summaries of monitored features, for example their mean, median, quantiles, etc. But, by monitoring and saving all relevant values, one has access to the full joint distribution of all quantities, a distribution that includes all uncertainties.

With  $\nu = 1, \dots, M$  indexing MCMC post-burn-in, pooled over chains samples, the following are available and need to be saved. Of course, the  $\mathbf{X}_k$  are also available.

- Population parameters  $\{\boldsymbol{\beta}^{(\nu)}, \tau^{(\nu)}\}$ ,  $\tau^{(\nu)} = \sqrt{\tau^{2(\nu)}}$ ; EA random effects ( $U_k^{(\nu)}$ ); and the  $X_{ik}$  are combined to produce woman-specific draws from the posterior distribution:

$$P_{ik}^{(\nu)} = P\left(\mathbf{X}_{ik}\boldsymbol{\beta}^{(\nu)} + U_k^{(\nu)}\right), \nu = 1, \dots, M; i = 1, \dots, n_k; k = 1, \dots, K \quad (1)$$

- These woman-specific posterior distributions are then ‘rolled-up’ to the EA-level, specifically, for each MCMC draw, let

$$P_{+k}^{(\nu)} = \sum_{i=1}^{n_k} P_{ik}^{(\nu)}, \nu = 1, \dots, M; k = 1, \dots, K \quad (2)$$

A big advantage of the MCMC approach is the availability of these samples. They can be analyzed to produce virtually any summary feature of the joint posterior distribution. For example, the posterior distribution of  $P_{+1} \times P_{+2}$  is obtained by computing products using the output data and summarizing the  $M$  values.

For each  $k$ , the following, EA-specific summaries using  $(P_{+k}^{(1)}, \dots, P_{+k}^{(M)})$  are of primary interest (of course, others can be computed):

- The full posterior distribution: the histogram or smoothed density
- The sample mean:

$$E(P_{+k} | \text{data}) = \bar{P}_{+k} = \frac{1}{M} \sum_{\nu} \sum_{i=1}^{n_k} P\left(\mathbf{X}_{ik}\boldsymbol{\beta}^{(\nu)} + U_k^{(\nu)}\right)$$

- $SD(P_{+k} | \text{data})$ : the sample standard deviation of the  $P_{+k}^{(\nu)}$ . Note that this is the SD of the estimate, so is its SE. (Warning: using the SE for CIs is not recommended!)
- Percentile-based CI: Their 2.5th, 50th and 97.5th percentiles with the 50th being a ‘point estimate’ and the (2.5th, 97.5th) producing a CI. Consider using the format,  $_{2.5}50_{97.5}$  (see Louis and Zeger, 2008)
- Moment-based CI:  $\bar{P}_{+k} \pm 1.96 \times SD(P_{+k})$  (not recommended!)  
Since the posterior distribution for a  $P_k$  can be highly skewed, the percentile approach is recommended. If you want the moment-based intervals, do compute them in the logit scale (compute logits of the  $P_{+k}^{(\nu)}$ , do the analysis and then invert (‘expit’) the endpoints. Better still, use the percentile-based CI.

- The posterior distribution of the  $U_k$ : for each  $EA_k$  the 2.5th, 50th and 97.5th percentiles with the 50th being a ‘point estimate’ and the (2.5th, 97.5th) producing a CI.

### Population parameters

Similar summaries of the population parameters are also available by data-analyzing the  $\{\beta^{(\nu)}, \tau^{(\nu)}\}, \nu = 1, \dots, T$ . In addition, you can plot, for example,  $\beta_1$  versus  $\beta_2$  or compute the full covariance matrix for the  $\beta$ s.

## 3 The first-order auto-regressive (AR1) model

We provide an overview; the relevant literature is needed to fill in the details. The index  $t$  denotes ‘wave’ and we focus on the  $U_{kt}$ . The complete model also includes the fixed-effects,  $\mathbf{X}_{ikt}\beta$  (a more general model would allow a  $t$  index on  $\beta$ , so  $\beta_t$ ).<sup>1</sup> As for all regression models, the implicit assumption is that the unconditional mean structure is modeled by the fixed effects and that the  $U_{kt}$  are residuals and have marginal mean 0.

We focus on the first-order, auto-regressive (AR1) model, starting with a model that allows for a wave-specific, cross-sectional variance ( $\tau_t^2$ ) and then specialize to  $\tau_t^2 \equiv \tau^2$ . Several other time-series models are candidates for inducing longitudinal association among the  $U_{kt}$ . We outline these in Section 3.5.

### 3.1 The AR1 model

- $U_{kt}$  are the EA- and wave-specific random effects,  $k = EA, t = \text{wave}$ .
- The AR1 model induces correlation,  $\rho^s, \rho \in [0, 1)$  for  $U$ s that are  $s$  time units apart.<sup>2</sup>
  - For equally spaced time increments,  $\rho^s = \text{cor}(U_{kt}, U_{k(t+s)})$
- Gaussian prior on the  $U_{kt} : [U_{11}, \dots, U_{K1} | \tau_t] \stackrel{iid}{\sim} N(0, \tau_t^2)$
- Options for the prior on the  $\tau_t^2$  (independent for each  $t$ ):
  - Inverse Gamma
  - Uniform over some interval
  - In `rstan`, ‘flat’
- Options for the prior for  $\rho$ 
 (for AR1 and other AR models  $\rho$  should be restricted to  $[0, 1]$ ):
  - Fisher’s Z: Half-normal  $\{\text{restricted to } [0, \infty)\}$  for  $Z(\rho) = 0.5 \times \log\{(1 + \rho)/(1 - \rho)\}$
  - $\rho \sim \text{Uniform}[0, 1.0]$

### 3.2 AR1 conditional distributions

We present conditional distributions for a general set of  $\tau_t^2$  and when  $\tau_t^2 \equiv \tau^2$ .

<sup>1</sup>Generally, a smoothing approach would be used rather than saturating the  $\beta_t$  model.

<sup>2</sup>Giving  $\rho < 0$  prior support is inappropriate for the AR1 model.

### 3.2.1 Longitudinal conditional distribution for a general $\tau_t^2$

Here is the distribution conditional on all *previous* U-values:

$$\begin{aligned} [U_{kt}|U_{k1}, \dots, U_{k(t-1)}; \tau_1, \dots, \tau_{t-1}, \tau_t, \rho] &= [U_{kt}|U_{k(t-1)}; \tau_{t-1}, \tau_t, \rho] \sim N(\rho\tau_t\tau_{t-1}^{-1}U_{k(t-1)}, (1-\rho^2)\tau_t^2) \\ &= \rho\tau_t\tau_{t-1}^{-1}U_{k(t-1)} + \tau_t(1-\rho^2)^{\frac{1}{2}}e_{kt} \\ e_{kt} &\sim N(0, 1) \text{ independent of the Us and the other } es \end{aligned}$$

Notes:

1. Marginally for wave  $t$ ,  $U_{kt}$  iid  $N(0, \tau_t^2)$
2. Even though we condition on all of the prior Us, only the most recent is used to compute the conditional mean
3. Setting  $\rho = 0$  unlinks the Us over time so that there is no 'learning' from wave to wave

### 3.2.2 Longitudinal conditional distribution for $\tau_t^2 \equiv \tau^2$

This is the one we'll be doing. Here is the distribution conditional on all *previous* U-values:

$$\begin{aligned} [U_{kt}|U_{k1}, \dots, U_{k(t-1)}; \tau, \rho] &= [U_{kt}|U_{k(t-1)}; \tau, \rho] \sim N(\rho U_{k(t-1)}, (1-\rho^2)\tau^2) \quad (3) \\ &= \rho U_{k(t-1)} + \tau(1-\rho^2)^{\frac{1}{2}}e_{kt} \\ e_{kt} &\sim N(0, 1) \text{ independent of the Us and the other } es \end{aligned}$$

Notes:

1. Marginally for wave  $t$ ,  $U_{kt}$  iid  $N(0, \tau^2)$
2. Even though we condition on all of the prior Us, only the most recent is used to compute the conditional mean
3. Setting  $\rho = 0$  unlinks the Us over time so that there is no 'learning' from wave to wave

### 3.3 The marginal distribution when $\tau_t \equiv \tau$

Taking  $K = 3$  and  $\tau_t \equiv \tau$ , the marginal distribution of  $\mathbf{U} = (U_{k1}, U_{k2}, U_{k3})'$  with equal time-spacing is,

$$\begin{aligned} \mathbf{U} &\sim N_3(\mathbf{0}, \tau^2 \mathbf{R}) \\ \mathbf{R} &= \begin{pmatrix} 1 & \rho & \rho^2 \\ \rho & 1 & \rho \\ \rho^2 & \rho & 1 \end{pmatrix} \quad (4) \end{aligned}$$

The correlations decrease exponentially fast with time-separation. Note that as in the foregoing equations, the conditional distributions use only the most proximal Us.

### 3.3.1 General conditional distribution when $\tau_t \equiv \tau$

The AR1 structure isn't restricted to longitudinal relations; it depends on 'neighbors.' For example, using the covariance matrix in equation (4), we have,

$$E(U_2 | U_1, U_3; \tau, \rho) = \left( \frac{2\rho}{1 + \rho^2} \right) \left( \frac{U_1 + U_3}{2} \right)$$

$$V(U_2 | U_1, U_3, \tau, \rho) = \left( \frac{1 - \rho^2}{1 + \rho^2} \right) \tau^2 \leq (1 - \rho^2) \tau^2$$

There is automatic conditioning on the two neighbors,  $U_1$  and  $U_3$ . Doing so reduces the variance more than just conditioning on  $U_1$  (no surprise!). More generally, with the AR1 structure

$$E(U_s | U_1, U_2, \dots, U_{s-1}, U_{s+1}, \dots; \tau, \rho) = \left( \frac{2\rho}{1 + \rho^2} \right) \left( \frac{U_{s-1} + U_{s+1}}{2} \right)$$

$$V(U_s | U_1, U_2, \dots, U_{s-1}, U_{s+1}, \dots; \tau, \rho) = \left( \frac{1 - \rho^2}{1 + \rho^2} \right) \tau^2$$

### 3.4 Bringing in the fixed effects

All of the foregoing is for the residuals  $U_{kt}$ . With covariates, let  $\theta_{ikt} = \text{logit}(P_{ikt})$ , and for specificity  $\tau_t \equiv \tau$ . With  $\mathbf{X}_{ik} = (\mathbf{X}_{ik1}, \mathbf{X}_{ik2}, \dots, \mathbf{X}_{ikt})$ , we have,

$$[\theta_{ikt} | U_{k1}, \dots, U_{k(t-1)}; \mathbf{X}_{ik}, \beta, \tau, \rho] \sim N \{ \mathbf{X}_{ikt} \beta + \rho U_{k(t-1)}, (1 - \rho^2) \tau^2 \}$$

$$= \mathbf{X}_{ikt} \beta + \rho U_{k(t-1)} + \tau (1 - \rho^2)^{\frac{1}{2}} e_{kt}$$

$$e_{kt} \sim N(0, 1) \text{ independent of the } U_s \text{ and the other } e_s$$

Note that the 'autoregression' is the same as equation (3), it operates on residuals.

### 3.5 Extensions

The AR1 model is a subset of a far more general ARIMA(p,q) (Autoregressive, Integrated Moving Average) models. The ARMA(p,q) are a subset of these, with the following representations (for a single  $k$ ). The  $e$  are all *iid* mean 0:

$$U_t = \sum_{\ell=1}^p \varphi_{\ell} U_{t-\ell} + e_t \quad \boxed{\text{ARMA}(p, 0)}$$

$$U_t = e_t + \sum_{\ell=1}^q \theta_{\ell} e_{t-\ell} \quad \boxed{\text{ARMA}(0, q)} \quad (5)$$

$$U_t = e_t + \sum_{\ell=1}^p \varphi_{\ell} U_{t-\ell} + \sum_{\ell=1}^q \theta_{\ell} e_{t-\ell} \quad \boxed{\text{ARMA}(p, q)}$$

We don't need this degree of flexibility and also don't have a sufficient number of waves to support much more than  $p + q \leq 2$ . We'll stay with AR1 probably forever, but it's interesting to see the relation between the ARMA(1,0) and the ARMA(0,1) covariance matrices.

Equation 4) is for the ARMA(1,0) model; the covariance for the ARMA(0,1) model, is:

$$\rho = \frac{\theta}{1 + \theta^2}$$

$$\mathbf{R} = \begin{pmatrix} 1 & \rho & 0 \\ \rho & 1 & \rho \\ 0 & \rho & 1 \end{pmatrix}$$

and more generally the diagonal is 1, the first super and sub diagonals are  $\rho$  and 0 elsewhere. In this model, the correlation persist irrespective of time-separation. An ARMA(1,1) model allows for correlation that decreases with time-separation down to a positive value rather than to 0.

## 4 Out of Sample Prediction

We consider general predictions and also those focused only on assessing fit of the regression model. The predictive distribution captures full uncertainty in a ‘future direct estimate’ by including uncertainty in the predictive model and in the observed data conditional on the predictive model. The standard Bayes estimates that condition on all observeds are as specified in Section 2; none of what follows changes them.

Out of sample prediction entails using a model informed by ‘training data’ to generate the full predictive, possibly joint, distribution for ‘out of sample’ units. In our context these are a subset of EAs identified by a list of  $(k, t)$  subscripts. The following assumes that a program is available that accommodates use of ‘NA’ to indicate a missing direct estimate, or program the model to treat missing data items as ‘parameters’ and that the  $M$  post-burn-in generated imputations for the associated  $EA_{kt}$  can be captured. If neither of these approaches are available, imputations need to be programmed ‘by hand’ (see Section ?? for a basic example). For complex models for the dependency of the  $U_{kt}$  (for example, a spatial model), it is quite challenging and most assuredly not recommended.

Note that in what follows we use  $Y_{kt}$  as shorthand for  $Y_{+kt}$ ,  $P_{kt}$  for  $P_{+kt}$  etc.

### 4.1 The method

The high-level method is very straightforward.

**Step 1:** Define,

$$\mathcal{I}_{kt} = \begin{cases} 1, & \text{if EA } (k, t) \text{ is to be imputed} \\ 0, & \text{if EA } (k, t) \text{ is in the training sample} \end{cases}$$

**Step 2:** If  $\mathcal{I}_{kt} = 1$ , put ‘NA’ for the direct estimate, or provide the appropriate code that treats the direct estimate as a parameter.

**Step 3:** Run the model, and retain the  $M$  post-burn-in draws for all unknowns including the imputed ‘direct estimates’ for EAs with  $\mathcal{I}_{kt} = 1$ .

**Step 4:** The draws for an EA with  $\mathcal{I}_{kt} = 1$  are the predictive distribution for it. In our application, denote them by  $\tilde{Y}_{kt}^{(\nu)}$  and so the predicted prevalences are

$$\tilde{P}_{kt}^{(\nu)} = \tilde{Y}_{kt}^{(\nu)} / n_{kt}, \quad (6)$$



where the tilde ( $\tilde{\cdot}$ ) denotes an imputed rather than an observed value.

- The  $(k, t)$ -specific mean,  $\tilde{P}_{kt}^{(\bullet)}$  gives the point estimate prediction
- The interval with endpoints at the 2.5th and 97.5th percentiles gives the 95% *prediction interval*
- If the direct estimate,  $\hat{P}_{kt}$ , is available (but not used in estimating the model), then one can compute the traditional (observed - predicted)/SD standardized residuals and also the more appropriate Z-value computed from the inverse Gaussian of the percentile location, along with other diagnostics (see Section 5).

## 4.2 Notes

- Of course,  $\mathcal{I}_{kt} \equiv 1$  for any EA for which we don't have the direct estimate. For EAs that have a direct estimate, we can choose to declare  $\mathcal{I}_{kt} = 1$  to obtain the out of sample, full predictive distribution.
- There needs to be sufficient information provided by the training data (the EAs with  $\mathcal{I}_{kt} = 0$ ) to support fitting the specified model). And, even if estimable, a model with high uncertainty posterior for the  $\beta$  or the  $\tau$  will produce broad predictions
- The model must be specified to support predictions. For example, if you want to use waves (1, 2, 3) to predict wave 4 and you want to allow for a wave-specific intercept, you need to have a way to trend the wave (1, 2, 3) intercepts to wave 4. The base case of 'no change' is a single column of 1s in the X-matrix ( $\mu_1 = \mu_2 = \mu_3 = \mu_4$ ). A linear trend is produced by two columns in the X-matrix, a column of 1s and a column  $(0, 1, 2, 3)'$ , producing  $\mu_t = \beta_0 + \beta_1(t - 1)$ , etc. Wave-specific intercepts are produced by using the full 4 degrees of freedom with the most directly interpretable being suppressing the overall intercept and including 4 columns in the design matrix with the  $t^{\text{th}}$  column having a 1 in the  $t^{\text{th}}$  location and 0s elsewhere.

## 5 Diagnostics

The full predictive distribution supports a wide variety of additional fit and performance assessments. If the modeling is correct or at least reasonably so, then the distribution of the ensemble,  $\{\tilde{P}_{kt}^{(\nu)}\}$ ,  $\nu = 1, \dots, M$  is an accurate depiction of location, spread, shape, etc. of the full predictive distribution. If not, then the direct estimates,  $\hat{P}_{kt}$  will not come from their respective, computed predictive distributions. One measure of this departure is that the collection of percentile locations will depart from  $U(0,1)$  and so also the inverse Gaussian transform will depart from a  $N(0,1)$  distribution. For model diagnostics, the following should only be used for  $(k, t)$  pair with  $\mathcal{I}_{kt} = 1$ .

### 5.1 Prediction mean, variance and SD

*Mean:* The prediction mean is,

$$E_{kt} = \tilde{P}_{kt}^{(\bullet)} = \frac{1}{M} \sum_{\nu=1}^M \tilde{P}_{kt}^{(\nu)} \quad (\text{the predicted prevalence}) \quad (7)$$

Note 1: **For EAs with  $\mathcal{I}_{kt} = 1$ :**  $E_{kt} = \tilde{P}_{kt}^{(\bullet)}$  is the general version of ‘Avelogistic<sub>kt</sub>,’ the predicted value that conditions on information **other than** the direct estimate. Therefore, this general definition of Avelogistic is the appropriate X-axis in assessing fit of the (logistic) regression model coupled with the assumed model for association amongst the  $U$ -values and the  $\tau_t$ . The full predictive distribution is appropriate evaluating for a wide variety of out of sample predictions, for example wave 4 direct estimates, using wave (1,2,3) training data along with the Xs for wave 4 and a joint distribution assumption on the  $U$ s (e.g, AR1). Performance can be compared for different sets of Xs, different assumptions on relations among the  $U$ s, and among the  $\tau_t$ .

Note 2: Avlogistic<sub>kt</sub> for an EA with  $\mathcal{I}_{kt} = 1$  mixes over the  $[U_{kt} | U_{\ell s}, \ell \neq k, s \neq t]$ .

(a) For example, if the model being fit specifies that the  $U_{kt}$  are completely independent, then Avlogistic<sub>kt</sub> for an EA with  $\mathcal{I}_{kt} = 1$  mixes over the prior distribution for that  $U_{kt}$ .

(b) If the model being fit specifies association among the  $U$ s (e.g., is spatial or autoregressive), then the posterior distribution ‘learns’ from other  $U$ -values.

Note 3: **For EAs with  $\mathcal{I}_{kt} = 0$ :**  $E_{kt} = \tilde{P}_{kt}^{(\bullet)}$  is the posterior mean that, in addition to other conditioning, conditions on the EA-specific direct estimate. The collection,  $\{\tilde{P}_{kt}^{(\nu)}\}, \nu = 1, \dots, M$  provide the full, posterior distribution.  $E_{kt}$  should not be used as the X-axis in a residual plot, but is the Bayes posterior mean estimate for EA  $k$  in wave  $t$ , and is the standard point estimate for comparing EAs, coloring maps, etc. The full distribution should be used for CIs (in Bayes-speak ‘credible intervals’) and the lengths of these to color maps, etc.

Note 4: The full predictive distribution supports point estimates other than the predictive mean. For example, in some applications the predictive median is more appropriate and in this case ‘mean’ should be replaced by ‘median’ in the foregoing Notes. More generally, pick your favorite one number summary (e.g., the 10% trimmed mean) and use it!

## 5.2 Mean, variance, SD of a residual

Equations (7) and (8) are used to compute the residual and the standardized residual, should only be used for the  $(k, t)$  pairs with  $\mathcal{I}_{kt} = 1$ , and of course they depend on availability of the direct estimate. The sample variance of the  $\tilde{P}_{kt}^{(\nu)}$  is:

$$V_{kt} = \frac{1}{M} \sum_{\nu=1}^M \left( \tilde{P}_{kt}^{(\nu)} - E_{kt} \right)^2 \quad (8)$$

$$SD_{kt} = V_{kt}^{\frac{1}{2}}$$

The direct estimate and residuals are:

$$\begin{aligned} \hat{P}_{kt} &= \frac{Y_{+kt}}{n_{kt}} \quad (\text{the direct estimate}) \\ \hat{R}_{kt} &= (\hat{P}_{kt} - E_{kt}) \\ R_{kt}^* &= \frac{\hat{R}_{kt}}{SD_{kt}} = \frac{\hat{P}_{kt} - E_{kt}}{SD_{kt}} \end{aligned} \quad (9)$$

Residuals  $\hat{R}_{kt}$  and  $R_{kt}^*$  in equation (9) are based on the observed direct estimate ( $\hat{P}_{kt}$ ) and so measure discrepancy from the assumed model with  $R_{kt}^*$  calibrated by the standard deviation of the predictive distribution. If the direct estimates have close to a Gaussian distribution, then the  $R_{kt}^*$  can be used to make residual plots, histograms, boxplots, QQ plots, etc. However, if the direct estimates are not close to Gaussian, then use the percentile approach described in Section 5.3. In any case, don't use the  $\hat{R}_{kt}$  for any diagnostics, because they haven't been calibrated by their standard deviation.

### 5.3 Using the full predictive distribution

The formulas in display (9) measure deviation in standard deviation units, but other measures less closely tied to the Gaussian distribution are available. The following are effective diagnostics, but any computation using the ensemble that targets fit is 'legal.' The following should only be computed for  $(k, t)$  with  $\mathcal{I}_{kt} = 1!$

1. Find the **percentile location** of  $\hat{P}_{kt}$  amongst the  $\{\tilde{P}_{kt}^{(\nu)}\}$ , denote it by  $\zeta_{kt}$ , and use for the standardized residual,

$$R_{kt}^{\ddagger} = \begin{cases} -4.0, & \text{if } \hat{P}_{kt} \text{ is below the range of the predictive distribution} \\ \Phi^{-1}(\zeta_{kt}), & \text{if } \hat{P}_{kt} \text{ is in the range of the predictive distribution} \\ 4.0, & \text{if } \hat{P}_{kt} \text{ is above the range of the predictive distribution} \end{cases}$$

See Cook et al. (2006) for a similar approach and Efron (2008) for an example of transforming to z-values.

To compute the percentile location it's important to move away from 0 and 1 and to account for ties. So, do the following,

$$\begin{aligned} \zeta_{kt} &= \frac{\#\{\tilde{P}_{kt}^{(\nu)} < \hat{P}_{kt}\} + \frac{1}{2}\#\{\tilde{P}_{kt}^{(\nu)} = \hat{P}_{kt}\}}{M} \\ &= \frac{2 \times \#\{\tilde{P}_{kt}^{(\nu)} < \hat{P}_{kt}\} + \#\{\tilde{P}_{kt}^{(\nu)} = \hat{P}_{kt}\}}{2M} \end{aligned} \quad (10)$$

Note that this ratio is strictly greater than 0 and strictly less than 1. Also, if all of the MCMC draws equal  $\hat{P}_{kt}$ , then  $\zeta = \frac{1}{2}$  and the residual is 0, as it should be.

If the predictive distribution is exactly Gaussian, these will be identical to the  $R_{kt}^*$  and in general are less dependent on the Gaussian assumption.

For example, if the predictive distribution were a single binomial (not our case!), here are comparisons of  $R^*$  and  $R^{\ddagger}$  when the direct estimate is 0. The formulas are:

$$\begin{aligned} R^* &= -\left(\frac{np}{1-p}\right)^{\frac{1}{2}} \\ R^{\ddagger} &= \Phi^{-1}\{0.5 \times (1-p)^n\} \end{aligned}$$

Of special note is that for small values of  $p$ ,  $R^{\ddagger} > R^*$ , and as  $p$  increases the relation reverses for  $n = 25$  (Table 1), but not for  $n = 5$  (Table 2). Similar relations hold for smaller values of  $n$ . The  $R^{\ddagger}$  residuals are more appropriate in that they pay attention to the details of the distribution. This benefit also applies when the approach is applied to the full, predictive distribution when producing residuals Q-Q plots, etc.

| p            | 0.005 | .01   | .05   | .10   | .50   |
|--------------|-------|-------|-------|-------|-------|
| $R^*$        | -0.35 | -0.50 | -1.15 | -1.67 | -5.00 |
| $R^\ddagger$ | -0.15 | -0.28 | -1.09 | -1.80 | -5.54 |

**Table 1:** Residuals when the predictive distribution is Bernoulli( $n = 25, p$ ) and the direct estimate is 0. This is not our exact situation because our full predictive distribution is composed of a sum of not necessarily identically distributed Bernoulli variates and it also includes uncertainty in the probability (uncertainty in  $p$ ).

| p            | 0.005 | .01   | .05   | .10   | .50   |
|--------------|-------|-------|-------|-------|-------|
| $R^*$        | -0.16 | -0.22 | -0.51 | -0.75 | -2.24 |
| $R^\ddagger$ | -0.03 | -0.06 | -0.29 | -0.54 | -2.15 |

**Table 2:** Residuals when the predictive distribution is Bernoulli( $n = 5, p$ ) and the direct estimate is 0. This is not our exact situation because our full predictive distribution is composed of a sum of not necessarily identically distributed Bernoulli variates and it also includes uncertainty in the probability (uncertainty in  $p$ ).

2. **Box-plots:** and other outlier diagnostics using the  $R_k^*$  or  $R_k^\ddagger$ .
3. **Residual plots:** with either  $R_k^*$  or  $R_k^\ddagger$  on the Y-axis and the appropriate  $AveLogistic_{kt}$  on the X-axis. Importantly, these X-axis values should be for an MCMC run with  $\mathcal{L}_{kt} = 1$  (see Note 1 below equation 7).
4. **Q-Q plots:** of the  $R_{kt}^*$  or the  $R_{kt}^\ddagger$  against a Gaussian (normal) reference. This will be a good diagnostic, but because  $\hat{P}_{kt}$  and the predictive distributions are computed, in part, from sums of 0/1 variables, even under the null hypothesis the distribution won't be exactly  $N(0,1)$ .
  - i. Equivalently, a Q-Q plot of the one-sided P-values computed using the  $R_{kt}^*$  or directly using the  $\zeta_{kt}$ , against a  $U(0,1)$  reference.
5. **Chi-square goodness of fit:** When using  $(\text{Observed} - \text{Predicted})/(\text{SD})$ ,

$$\chi_{df}^2 = \sum_1^K (R_{kt}^*)^2 \quad (\text{see equation 9}) \quad (11)$$

or, when using the percentile approach

$$\chi_{df}^2 = \sum_1^K (R_{kt}^\ddagger)^2 \quad (\text{see Diag 1})$$

The exact df needs to be determined and will depend on whether the assessment is in or out of sample, and on the correlation structure assumed for the  $U_{kt}$ . It is surely no greater than  $K$  and for the AR1 or a spatial model considerably smaller.

## 5.4 Additional summaries

Out of sample residuals are central to assessing the performance of a model, but shouldn't be the only components a report or an evaluation. Here are a few others, with not intention to provide a complete list.

### 5.4.1 Shrinkage plots

In addition to the residual plot in Section 5.3, two ‘shrinkage plots’ are informative.

*Direct estimate to Bayes:*

- Direct estimates plotted horizontally sufficiently far above the X-axis
- Whisker for each proportional to the length of the 95%, Binomial likelihood-based CI using the numerator and denominator of the direct estimate
- Bayes estimates plotted horizontally on the X-axis
- Lines connecting the Direct and the Bayes

*(Direct - Avelogistic) to (Bayes - Avelogistic):*

- (Direct - Avelogistic) plotted horizontally sufficiently far above the X-axis
- Whisker for each proportional to the length of the 95%, Binomial likelihood-based CI using the numerator and denominator of the direct estimate
- (Bayes - Avelogistic) plotted horizontally on the X-axis
- Lines connecting the Direct and the Bayes
  - **Note:** Unlike in Gaussian/Gaussian model, the signs of (Direct - Avelogistic) and (Bayes - Avelogistic) can differ; a line can cross 0. Crossing can occur when Avelogistic is sufficiently far from 0.5 and the Direct estimate is sufficiently close to Avelogistic.

### 5.4.2 The degree of shrinkage

The degree of shrinkage for  $EA_{kt}$  is,

$$\text{Shrinkage}_{kt} = \frac{\text{Direct}_{kt} - \text{Bayes}_{kt}}{\text{Direct}_{kt} - \text{Avelogistic}_{kt}} \quad (12)$$

The between-EA variance ( $\tau^2$ ) plays a role in how much an estimate shrinks towards the regression model; it’s all relative. For example, if  $\tau^2$  is small relative to the variance of a direct estimate (more properly, if the posterior distribution of  $\tau^2$  has most of its mass far below the variance of the direct estimate), then the regression model will get a lot of weight even if the variance of the direct estimate is small. On the other hand, if the posterior distribution of  $\tau^2$  has most of its mass far above the variance of the direct estimate, then the regression model will get relatively little weight.

### 5.4.3 Reduction in uncertainty

Because the SD isn’t the best summary for binomial and other non-Gaussian data, it is far better to compare the length of the PROPERLY COMPUTED, EXACT 95% CI associated with the direct estimate<sup>3</sup> and the length of the 95% probability content of the Bayes credibility interval (provided by the MCMC output). Their ratio gives a good indication of the improved stability conferred by the Bayesian model. If the lengths of the CIs based on the direct estimates and the Bayes estimates are similar, then there has been no ‘Bayes advantage’ and unless the direct estimates are all very stable (in which case there is no reason to stabilize them), it is worth looking for additional covariates (or transforms of current, interactions of current) that have predictive power and thereby shift the posterior distribution of  $\tau^2$  closer to

<sup>3</sup>In R use `binconf` with `method = ‘exact’`

0. If there are no such covariates, then so be it, we need to live with what we have. I stress comparisons should be on CI length, because while for Gaussian data it's equivalent to comparing SDs, for count data, especially when an estimate is near 0, they aren't equivalent.

Related, as indicated in Section 5.4.1 use exact 95% CI length for whiskers: For our shrinkage plots it is better to set the whiskers proportional to the length of the exact 95% CI associated with the direct estimate rather than proportional to the SD.

#### 5.4.4 Model criticism

As in evaluating a standard (non-Bayesian) regression or logistic regression, we don't expect that the residuals will all be very close to 0, but for a good model we do expect that the standardized residuals will look reasonable relative to random variables that have mean 0 and variance 1 (not necessarily Gaussian). Ditto for the Bayesian approach and with the percentile method for residuals the Zs should be close to Gaussian.

As for standard diagnostics, patterns matter as much as magnitude, and plotting standardized residuals (ideally the percentile-based ones) versus the relevant Avelogistic values is a good way to identify model lack of fit that might be reduced by including additional covariates including carefully chosen interactions based on currently included covariates. The issue here are essentially identical to traditional modeling.

Traditional models use AIC, BIC, adjusted  $R^2$ , and other one-number summaries to assess fit. In addition, Bayesian models with MCMC support DIC which is interpreted in a manner similar to AIC and BIC.

## 6 Aggregation Diagnostics

Comparing aggregated posterior mean or median estimates to the direct estimate associated with the aggregated regions can help diagnose model inadequacy. Aggregation needs to be sufficient so that the aggregated direct estimates and the aggregated Bayes estimates are stable and can be trusted. Subject to this requirement, any aggregation is 'fair game' with the most spatially logical being to aggregate nested domains (e.g., EAs aggregated to regions, regions to the country). These comparisons can be 'decorated' with uncertainty estimates (see Section 5), but with sufficient aggregation, uncertainty will be relatively small.

### 6.1 Country-level aggregation

Recall that we use the shorthand  $Y_{kt} = \sum_{i=i}^{n_{kt}} Y_{ikt}$ , etc. Aggregating EAs to the country-level is straightforward. For a fit assessment, compute a weighted average of the  $Y_{kt}^{(\nu)}$ , producing,

$$Y_{\mathbf{wt}}^{(\nu)} = \sum_k w_{kt} Y_{kt}^{(\nu)}, \nu = 1, \dots, M \quad (13)$$

and see where  $\hat{P}_{\mathbf{wt}} = \sum_k w_{kt} \hat{P}_{kt}$  falls in the distribution. The  $w_{kt}$  need to be specified; use  $w_{kt} = n_{kt}/n_{+t}$ , if the  $n_{kt}$  are proportional to the population size (i.e., the number of eligible women) of region  $k$ ; otherwise use weights based on the true population sizes. Section 6.2 provides additional details. This computation is equivalent to comparing  $\hat{P}_{\mathbf{wt}}$  to the aggregated  $E_{\mathbf{wt}} = \sum_k w_{kt} E_{kt}$ . It produces a single number, but can be helpful.

## 6.2 General aggregation

Let  $\mathcal{A}$  indicate the EAs to be aggregated. That is,  $\mathcal{A}$  is a list of subscripts  $\{k_1, k_2, \dots, k_{|\mathcal{A}|}\}$ , where  $|\mathcal{A}|$  is the number of subscripts in  $\mathcal{A}$ . Then, compute,

$$Y_{\text{wt}|\mathcal{A}}^{(\nu)} = \left( \frac{1}{\sum_{k \in \mathcal{A}} w_{kt}} \right) \sum_{k \in \mathcal{A}} w_{kt} Y_{kt}^{(\nu)}, \nu = 1, \dots, M \quad (14)$$

and use as in Section 6.1 Compute the foregoing for a collection of  $\mathcal{A}$  that partition the EA space (e.g., regions), look at patterns, etc. Any partition can be used, ideally motivated by substantive considerations such as aggregated urban and aggregated rural. The collection of these aggregations can be very helpful in diagnosing model inadequacies, especially when aggregation is sufficient so that the aggregated direct are stable.

## 6.3 Benchmarking

The goal is to 'roll up' to a target prevalence, for example the directly estimated country prevalence. If the modeling is reasonably good, the rolled-up (usually weighted by EA sample size) Bayesian estimates should come close to the target. If not, either it's an inappropriate target or the modeling wasn't very good. In any case, estimates can be adjusted (benchmarked) to produce the match. There are a variety of ways to force the Bayes estimates (the posterior means) to benchmark, and this is the subject of a forthcoming section. Suffice for now that there are two views on forcing a benchmark:

- Force benchmarking so that the estimates are 'face-valid' to stakeholders.
- Don't force benchmarking; notable discrepancies indicate model inadequacy and these should be remedied.

The most naive, and definitely not recommended, is to *rake* the estimates by applying a common factor to the EA-specific estimates (Bayes or otherwise). For example, if the rolled-up Bayes estimates are 1% higher than the target, divide each of them by 1.01 to guarantee the match. More appropriate is to optimize predictions, subject to a (linear) benchmarking constraint (see, Bell et al., 2013), replacing,

'EA-specific estimates are the mean of the posterior distribution; they minimize posterior squared-error loss.'

By,

'EA-specific estimates minimize posterior-squared error loss, *subject to the linear constraint that they roll up to the target.*'

Though the foregoing is very appropriate for benchmarking posterior means, it can't deal with non-standard goals such as ranks and it's not clear what benchmarking would mean in that context. However, recent work I'm doing with Beka Steorts (Duke), embeds the benchmarking in the full posterior distribution so that any quantity computed from it will be 'benchmarked.' Work on this idea continues.

## Bibliography

- Banerjee, S., Carlin, B. P., and Gelfand, A. E. *Hierarchical Modeling and Analysis of Spatial Data (Second Edition)*. Chapman and Hall/CRC (2014).
- Bell, W. R., Datta, G. S., and Ghosh, M. "Benchmarking Small Area Estimators." *Biometrika*, 100:189–202 (2013).
- Carlin, B. P. and Louis, T. A. *Bayesian Methods for Data Analysis, 3rd edition*. Boca Raton, FL: Chapman and Hall/CRC Press, 3<sup>rd</sup> edition (2009).
- Cook, S. R., Gelman, A., and Rubin, D. B. "Validation of software for Bayesian models using posterior quantiles." *J. Comput. Graph. Statist.*, 15:675–692 (2006).
- Diggle, P. J. *Statistical Analysis of Spatial and Spatio-Temporal Point Patterns*. Chapman and Hall/CRC (2014).
- Efron, B. "Microarrays, Empirical Bayes and the Two-Group Model." *Statistical Science*, 23:1–22 (2008).
- Gelman, A., Carlin, J., Stern, H. S., Dunson, D. B., Vehtari, A., and Rubin, D. *Bayesian Data Analysis, 3rd edition*. Boca Raton, FL: Chapman and Hall/CRC Press (2013).
- Little, R. J. "To Model or Not To Model? Competing Modes of Inference for Finite Population Sampling." *Journal of The American Statistical Association*, 99:546–556 (2004).
- . "Calibrated Bayes, an Alternative Inferential Paradigm for Official Statistics (with discussion)." *Journal of Official Statistics*, 28:309–372 (2012).
- Louis, T. A. and Zeger, S. L. "Effective communication of standard errors and confidence intervals." *Biostatistics*, 10:1–2 (2008).



## Part II: Detailed Results

## PMA2020 sample design

PMA2020 survey samples are designed to provide estimates of the mCPR indicator with a margin of error of 2 percentage points at the national level and within 3 percentage points for rural and urban areas separately. Burkina Faso, Ghana and Uganda surveys employed a two-stage sampling strategy (urban-rural strata and then enumeration area (EA)). Ethiopia and Kenya had an additional level, stratifying first by region and county respectively. Once stratified by rural/urban residence, EAs were randomly selected in all countries. In selected EAs, all households were mapped and listed, and then with a random start, between 35 and 42 households were systematically selected for interviews. The EA size varied depending on the expected response rate and number of eligible women per household.

Local government agencies that sponsored the PMA2020 surveys often requested the sample be designed to provide subnational estimates for their administrative divisions. This has challenged the project's limited resources, usually leading to some but not all subnational units being accommodated in the sampling. Specifically, in addition to the stratification by urban-rural residency, Ethiopia and Kenya had an additional level, stratifying first by region and county respectively. In Ethiopia, of the 11 regions five account for more than 80% of the country's populations and were identified for subnational sampling, while the remaining six combined into a residual region group. EAs were allocated proportionally across the six regional groups. In Kenya, following the 2013 general election, 47 counties constituted the government's Level-1 administrative units. The Kenyan National Council for Population and Development and the Ministry of Health sought county-level estimates from the PMA2020 surveys. With a probability proportional to size (PPS) approach and within allowable resources, nine counties were selected to provide county-level estimates while in the aggregate also providing national and urban-rural estimates of mCPR. These nine counties encompass almost 30 percent of the population based on the 2009 census. Over time, independently drawn EAs were added to the samples for Ethiopia and Kenya. However, the analytic samples for this study are based on the EA samples consistently included across all four rounds (or two rounds in Burkina Faso).

Table 1: Woman-level outcome, covariates and their definitions

| <b>Indicator</b>                | <b>Definitions of indicators and categories</b>                                                             |
|---------------------------------|-------------------------------------------------------------------------------------------------------------|
| <b><u>Outcome</u></b>           |                                                                                                             |
| <b>Modern contraceptive use</b> | Whether currently using a modern contraceptive method                                                       |
| <b><u>Covariates</u></b>        |                                                                                                             |
| <b>Residence</b>                | Urban, rural, metropolitan residence                                                                        |
| <b>Schooling</b>                | Highest level attained: No education, primary, secondary or above                                           |
| <b>Wealth quintile</b>          | Five groups of approximately equal size based on a factor analysis score constructed from household assets  |
| <b>Child survival</b>           | Whether the last child born in the preceding two years is still alive                                       |
| <b>Age</b>                      | Five-year age groups (15-19 years, ..., 45-49 years)                                                        |
| <b>Cohabitation</b>             | Not married; married and living with husband; married but not living with husband                           |
| <b>Recent sex</b>               | Whether had sex in the past 4 weeks                                                                         |
| <b>Health worker visit</b>      | Whether visited at home by a health worker in the last 12 months                                            |
| <b>FP message</b>               | Whether heard a family planning (FP) message on radio/TV or saw in print in past 12 months                  |
| <b>Fertility intention</b>      | Whether desires her next pregnancy 24 months or later                                                       |
| <b>Parity</b>                   | Number of live births                                                                                       |
| <b>Distance</b>                 | Distance (km, log transformed) to the nearest facility providing three or more modern contraceptive methods |

Table 2a: Sample Characteristics for Ghana PMA Rounds 1-4

| Indicator                       | Round    |        |          |        |          |        |          |         |          |        |
|---------------------------------|----------|--------|----------|--------|----------|--------|----------|---------|----------|--------|
|                                 | 1        |        | 2        |        | 3        |        | 4        |         | Total    |        |
|                                 | No.      | %      | No.      | %      | No.      | %      | No.      | %       | No.      | %      |
| <b>Modern contraceptive use</b> |          |        |          |        |          |        |          |         |          |        |
| Yes                             | 591      | 14.0   | 520      | 14.4   | 770      | 18.1   | 1,108    | 22.8    | 2,988    | 17.6   |
| No                              | 3,636    | 86.0   | 3,102    | 85.6   | 3,476    | 81.9   | 3,746    | 77.2    | 13,960   | 82.4   |
| <b>Residence</b>                |          |        |          |        |          |        |          |         |          |        |
| Rural                           | 1,983    | 46.9   | 1,677    | 46.3   | 1,606    | 37.8   | 1,769    | 36.5    | 7,036    | 41.5   |
| Urban                           | 1,457    | 34.5   | 1,315    | 36.3   | 1,834    | 43.2   | 2,228    | 45.9    | 6,835    | 40.3   |
| Metropolitan                    | 786      | 18.6   | 629      | 17.4   | 806      | 19.0   | 856      | 17.6    | 3,077    | 18.2   |
| <b>Schooling</b>                |          |        |          |        |          |        |          |         |          |        |
| No education                    | 893      | 21.1   | 753      | 20.8   | 790      | 18.6   | 871      | 18.0    | 3,307    | 19.5   |
| Primary school                  | 770      | 18.2   | 686      | 18.9   | 733      | 17.3   | 872      | 18.0    | 3,061    | 18.1   |
| Secondary school                | 2,564    | 60.7   | 2,183    | 60.3   | 2,723    | 64.1   | 3,110    | 64.1    | 10,580   | 62.4   |
| <b>Wealth quintile</b>          |          |        |          |        |          |        |          |         |          |        |
| Poorest                         | 784      | 18.6   | 826      | 22.8   | 844      | 19.9   | 1,053    | 21.7    | 3,507    | 20.7   |
| Poorer                          | 793      | 18.8   | 656      | 18.1   | 808      | 19.0   | 956      | 19.7    | 3,213    | 19.0   |
| Middle                          | 771      | 18.2   | 734      | 20.3   | 928      | 21.9   | 982      | 20.2    | 3,414    | 20.1   |
| Richer                          | 869      | 20.6   | 717      | 19.8   | 866      | 20.4   | 917      | 18.9    | 3,370    | 19.9   |
| Richest                         | 1,010    | 23.9   | 688      | 19.0   | 800      | 18.8   | 945      | 19.5    | 3,444    | 20.3   |
| <b>Last child died</b>          |          |        |          |        |          |        |          |         |          |        |
| Yes                             | 53       | 1.3    | 27       | 0.7    | 30       | 0.7    | 37       | 0.8     | 147      | 0.9    |
| No                              | 4,174    | 98.7   | 3,595    | 99.3   | 4,216    | 99.3   | 4,816    | 99.2    | 16,801   | 99.1   |
| <b>Age group</b>                |          |        |          |        |          |        |          |         |          |        |
| 15-19 years                     | 767      | 18.2   | 685      | 18.9   | 777      | 18.3   | 977      | 20.1    | 3,207    | 18.9   |
| 20-24 years                     | 772      | 18.3   | 621      | 17.1   | 796      | 18.7   | 926      | 19.1    | 3,114    | 18.4   |
| 25-29 years                     | 779      | 18.4   | 642      | 17.7   | 746      | 17.6   | 831      | 17.1    | 2,998    | 17.7   |
| 30-34 years                     | 578      | 13.7   | 567      | 15.7   | 658      | 15.5   | 749      | 15.4    | 2,553    | 15.1   |
| 35-39 years                     | 561      | 13.3   | 490      | 13.5   | 526      | 12.4   | 591      | 12.2    | 2,168    | 12.8   |
| 40-44 years                     | 429      | 10.1   | 329      | 9.1    | 370      | 8.7    | 389      | 8.0     | 1,516    | 8.9    |
| 45-49 years                     | 341      | 8.1    | 288      | 7.9    | 373      | 8.8    | 391      | 8.0     | 1,392    | 8.2    |
| <b>Cohabitation</b>             |          |        |          |        |          |        |          |         |          |        |
| Not married                     | 1,433    | 33.9   | 1,458    | 40.2   | 1,810    | 42.6   | 2,124    | 43.8    | 6,825    | 40.3   |
| Live together                   | 1,872    | 44.3   | 1,573    | 43.4   | 1,726    | 40.6   | 1,918    | 39.5    | 7,089    | 41.8   |
| Not living together             | 921      | 21.8   | 591      | 16.3   | 710      | 16.7   | 811      | 16.7    | 3,033    | 17.9   |
| <b>Had sex last 4 weeks</b>     |          |        |          |        |          |        |          |         |          |        |
| Yes                             | 1,785    | 42.2   | 1,545    | 42.7   | 1,916    | 45.1   | 2,462    | 50.7    | 7,708    | 45.5   |
| No                              | 2,442    | 57.8   | 2,076    | 57.3   | 2,330    | 54.9   | 2,391    | 49.3    | 9,239    | 54.5   |
| <b>Visited by health worker</b> |          |        |          |        |          |        |          |         |          |        |
| Yes                             | 717      | 17.0   | 571      | 15.8   | 573      | 13.5   | 613      | 12.6    | 2,475    | 14.6   |
| No                              | 3,509    | 83.0   | 3,051    | 84.2   | 3,673    | 86.5   | 4,240    | 87.4    | 14,473   | 85.4   |
| <b>FP message</b>               |          |        |          |        |          |        |          |         |          |        |
| Yes                             | 3,176    | 75.1   | 2,608    | 72.0   | 3,140    | 74.0   | 3,697    | 76.2    | 12,622   | 74.5   |
| No                              | 1,051    | 24.9   | 1,013    | 28.0   | 1,106    | 26.0   | 1,156    | 23.8    | 4,326    | 25.5   |
| <b>Desire to postpone</b>       |          |        |          |        |          |        |          |         |          |        |
| Yes                             | 1,439    | 34.0   | 1,179    | 32.6   | 1,358    | 32.0   | 1,695    | 34.9    | 5,671    | 33.5   |
| No                              | 2,788    | 66.0   | 2,442    | 67.4   | 2,888    | 68.0   | 3,159    | 65.1    | 11,277   | 66.5   |
|                                 | Mean /SD | Median | Mean /SD | Median | Mean /SD | Median | Mean /SD | Median  | Mean /SD | Median |
| <b>Parity</b>                   | 2.3/2.3  | 1.7    | 2.2/2.3  | 1.6    | 2.0/2.1  | 1.5    | 1.9/2.1  | 1.3     | 2.1/2.2  | 1.5    |
| <b>Distance</b>                 | 7.3/9.6  | 2.2    | 8.0/11.5 | 2.2    | 3.4/6.8  | 0.8    | 3.1/6.0  | 0.74779 | 5.2/8.8  | 1.1    |
| <b>Total</b>                    | 4,227    | 100.0  | 3,621    | 100.0  | 4,246    | 100.0  | 4,853    | 100.0   | 16,948   | 100.0  |

Note: Sample of females 15 to 49 years of age. See Table 1 for variable definitions.

Table 2b: Sample Characteristics for Ethiopia PMA Rounds 1-4

| Indicator                       | Round       |        |             |        |             |        |             |        |             |        |
|---------------------------------|-------------|--------|-------------|--------|-------------|--------|-------------|--------|-------------|--------|
|                                 | 1           |        | 2           |        | 3           |        | 4           |        | Total       |        |
|                                 | No.         | %      | No.         | %      | No.         | %      | No.         | %      | No.         | %      |
| <b>Modern Contraceptive</b>     |             |        |             |        |             |        |             |        |             |        |
| Yes                             | 1,231       | 23.4   | 1,484       | 24.4   | 1,580       | 26.8   | 1,596       | 27.0   | 5,890       | 25.4   |
| No                              | 4,023       | 76.6   | 4,599       | 75.6   | 4,324       | 73.2   | 4,313       | 73.0   | 17,259      | 74.6   |
| <b>Residence</b>                |             |        |             |        |             |        |             |        |             |        |
| Rural                           | 3,990       | 75.9   | 4,598       | 75.6   | 4,344       | 73.6   | 4,308       | 72.9   | 17,240      | 74.5   |
| Urban                           | 872         | 16.6   | 1,165       | 19.2   | 1,212       | 20.5   | 1,267       | 21.4   | 4,516       | 19.5   |
| Metropolitan                    | 392         | 7.5    | 319         | 5.3    | 348         | 5.9    | 334         | 5.7    | 1,394       | 6.0    |
| <b>Schooling</b>                |             |        |             |        |             |        |             |        |             |        |
| No education                    | 2,284       | 43.5   | 2,604       | 42.8   | 2,490       | 42.2   | 2,300       | 38.9   | 9,678       | 41.8   |
| Primary school                  | 2,020       | 38.4   | 2,312       | 38.0   | 2,207       | 37.4   | 2,315       | 39.2   | 8,854       | 38.2   |
| Secondary school                | 950         | 18.1   | 1,166       | 19.2   | 1,207       | 20.4   | 1,295       | 21.9   | 4,618       | 19.9   |
| <b>Wealth quintile</b>          |             |        |             |        |             |        |             |        |             |        |
| Poorest                         | 850         | 16.2   | 1,022       | 16.8   | 1,048       | 17.8   | 1,043       | 17.6   | 3,963       | 17.1   |
| Poorer                          | 877         | 16.7   | 1,146       | 18.8   | 1,075       | 18.2   | 1,038       | 17.6   | 4,137       | 17.9   |
| Middle                          | 943         | 17.9   | 1,170       | 19.2   | 1,115       | 18.9   | 1,072       | 18.1   | 4,300       | 18.6   |
| Richer                          | 1,163       | 22.1   | 1,288       | 21.2   | 1,196       | 20.3   | 1,234       | 20.9   | 4,882       | 21.1   |
| Richest                         | 1,420       | 27.0   | 1,456       | 23.9   | 1,470       | 24.9   | 1,522       | 25.8   | 5,868       | 25.4   |
| <b>Last child died</b>          |             |        |             |        |             |        |             |        |             |        |
| Yes                             | 76          | 1.5    | 114         | 1.9    | 104         | 1.8    | 138         | 2.3    | 433         | 1.9    |
| No                              | 5,177       | 98.5   | 5,969       | 98.1   | 5,799       | 98.2   | 5,771       | 97.7   | 22,716      | 98.1   |
| <b>Age group</b>                |             |        |             |        |             |        |             |        |             |        |
| 15-19 years                     | 1,197       | 22.8   | 1,426       | 23.4   | 1,389       | 23.5   | 1,401       | 23.7   | 5,413       | 23.4   |
| 20-24 years                     | 901         | 17.2   | 1,114       | 18.3   | 1,105       | 18.7   | 1,032       | 17.5   | 4,152       | 17.9   |
| 25-29 years                     | 983         | 18.7   | 1,226       | 20.2   | 1,041       | 17.6   | 1,058       | 17.9   | 4,308       | 18.6   |
| 30-34 years                     | 750         | 14.3   | 791         | 13.0   | 774         | 13.1   | 814         | 13.8   | 3,129       | 13.5   |
| 35-39 years                     | 714         | 13.6   | 753         | 12.4   | 766         | 13.0   | 694         | 11.7   | 2,927       | 12.6   |
| 40-44 years                     | 412         | 7.8    | 447         | 7.4    | 451         | 7.6    | 501         | 8.5    | 1,811       | 7.8    |
| 45-49 years                     | 295         | 5.6    | 326         | 5.4    | 378         | 6.4    | 410         | 6.9    | 1,410       | 6.1    |
| <b>Cohabitation</b>             |             |        |             |        |             |        |             |        |             |        |
| Not married                     | 1,688       | 32.1   | 2,152       | 35.4   | 2,178       | 36.9   | 2,270       | 38.4   | 8,288       | 35.8   |
| Live together                   | 3,050       | 58.1   | 3,705       | 60.9   | 3,470       | 58.8   | 3,416       | 57.8   | 13,641      | 58.9   |
| Not live together               | 515         | 9.8    | 226         | 3.7    | 256         | 4.3    | 223         | 3.8    | 1,220       | 5.3    |
| <b>Had sex last 4 weeks</b>     |             |        |             |        |             |        |             |        |             |        |
| Yes                             | 2,624       | 49.9   | 3,257       | 53.5   | 3,418       | 57.9   | 3,326       | 56.3   | 12,625      | 54.5   |
| No                              | 2,630       | 50.1   | 2,826       | 46.5   | 2,485       | 42.1   | 2,583       | 43.7   | 10,525      | 45.5   |
| <b>Visited by health worker</b> |             |        |             |        |             |        |             |        |             |        |
| Yes                             | 1,142       | 21.7   | 1,105       | 18.2   | 1,224       | 20.7   | 1,023       | 17.3   | 4,495       | 19.4   |
| No                              | 4,111       | 78.3   | 4,978       | 81.8   | 4,680       | 79.3   | 4,886       | 82.7   | 18,654      | 80.6   |
| <b>FP message</b>               |             |        |             |        |             |        |             |        |             |        |
| Yes                             | 2,158       | 41.1   | 2,506       | 41.2   | 2,562       | 43.4   | 2,592       | 43.9   | 9,819       | 42.4   |
| No                              | 3,095       | 58.9   | 3,576       | 58.8   | 3,342       | 56.6   | 3,317       | 56.1   | 13,330      | 57.6   |
| <b>Desire to postpone</b>       |             |        |             |        |             |        |             |        |             |        |
| Yes                             | 1,391       | 26.5   | 1,874       | 30.8   | 1,992       | 33.7   | 2,116       | 35.8   | 7,373       | 31.8   |
| No                              | 3,862       | 73.5   | 4,209       | 69.2   | 3,912       | 66.3   | 3,792       | 64.2   | 15,776      | 68.2   |
|                                 | Mean/S<br>D | Median | Mean/<br>SD | Median | Mean/<br>SD | Median | Mean/<br>SD | Median | Mean/<br>SD | Median |
| <b>Parity</b>                   | 2.2/2.5     | 1.4    | 2.1/2.5     | 1.2    | 2.1/2.5     | 1.2    | 2.1/2.5     | 1.2    | 2.1/2.5     | 1.3    |
| <b>Distance</b>                 | 4.6/10.2    | 1.0    | 1.6/3.3     | 0.8    | 1.6/3.0     | 0.8    | 1.6/3.4     | 0.8    | 2.3/5.9     | 0.8    |
| <b>Total</b>                    | 5,253       | 100.0  | 6,083       | 100.0  | 5,904       | 100.0  | 5,909       | 100.0  | 23,149      | 100.0  |

Note: Sample of females 15 to 49 years of age. See Table 1 for variable definitions.

Table 2c: Sample Characteristics for Kenya PMA Rounds 1-4

| Indicator                       | Round    |        |          |        |          |        |          |        |          |        |
|---------------------------------|----------|--------|----------|--------|----------|--------|----------|--------|----------|--------|
|                                 | 1        |        | 2        |        | 3        |        | 4        |        | Total    |        |
|                                 | No.      | %      | No.      | %      | No.      | %      | No.      | %      | No.      | %      |
| <b>Modern contraceptive use</b> |          |        |          |        |          |        |          |        |          |        |
| Yes                             | 1,534    | 41.7   | 1,723    | 40.3   | 2,010    | 46.5   | 2,207    | 46.0   | 7,475    | 43.7   |
| No                              | 2,147    | 58.3   | 2,556    | 59.7   | 2,313    | 53.5   | 2,596    | 54.0   | 9,612    | 56.3   |
| <b>Residence</b>                |          |        |          |        |          |        |          |        |          |        |
| Rural                           | 2,104    | 57.1   | 2,590    | 60.5   | 2,616    | 60.5   | 2,947    | 61.4   | 10,256   | 60.0   |
| Urban                           | 866      | 23.5   | 920      | 21.5   | 969      | 22.4   | 1,065    | 22.2   | 3,821    | 22.4   |
| Metropolitan                    | 711      | 19.3   | 769      | 18.0   | 738      | 17.1   | 791      | 16.5   | 3,010    | 17.6   |
| <b>Schooling</b>                |          |        |          |        |          |        |          |        |          |        |
| No education                    | 142      | 3.9    | 158      | 3.7    | 187      | 4.3    | 187      | 3.9    | 675      | 4.0    |
| Primary school                  | 1,830    | 49.7   | 2,151    | 50.3   | 2,107    | 48.7   | 2,341    | 48.7   | 8,429    | 49.3   |
| Secondary school                | 1,709    | 46.4   | 1,970    | 46.0   | 2,029    | 46.9   | 2,274    | 47.4   | 7,982    | 46.7   |
| <b>Wealth quintile</b>          |          |        |          |        |          |        |          |        |          |        |
| Poorest                         | 625      | 17.0   | 858      | 20.0   | 893      | 20.7   | 1,023    | 21.3   | 3,398    | 19.9   |
| Poorer                          | 635      | 17.2   | 892      | 20.8   | 890      | 20.6   | 1,014    | 21.1   | 3,431    | 20.1   |
| Middle                          | 662      | 18.0   | 833      | 19.5   | 879      | 20.3   | 981      | 20.4   | 3,354    | 19.6   |
| Richer                          | 810      | 22.0   | 834      | 19.5   | 797      | 18.4   | 840      | 17.5   | 3,280    | 19.2   |
| Richest                         | 950      | 25.8   | 863      | 20.2   | 865      | 20.0   | 945      | 19.7   | 3,623    | 21.2   |
| <b>Last child died</b>          |          |        |          |        |          |        |          |        |          |        |
| Yes                             | 45       | 1.2    | 31       | 0.7    | 55       | 1.3    | 44       | 0.9    | 175      | 1.0    |
| No                              | 3,636    | 98.8   | 4,248    | 99.3   | 4,269    | 98.7   | 4,758    | 99.1   | 16,911   | 99.0   |
| <b>Age group</b>                |          |        |          |        |          |        |          |        |          |        |
| 15-19 years                     | 487      | 13.2   | 813      | 19.0   | 684      | 15.8   | 967      | 20.1   | 2,950    | 17.3   |
| 20-24 years                     | 812      | 22.0   | 803      | 18.8   | 928      | 21.5   | 974      | 20.3   | 3,517    | 20.6   |
| 25-29 years                     | 861      | 23.4   | 860      | 20.1   | 906      | 21.0   | 968      | 20.2   | 3,595    | 21.0   |
| 30-34 years                     | 560      | 15.2   | 576      | 13.5   | 631      | 14.6   | 656      | 13.6   | 2,423    | 14.2   |
| 35-39 years                     | 439      | 11.9   | 501      | 11.7   | 481      | 11.1   | 553      | 11.5   | 1,974    | 11.6   |
| 40-44 years                     | 298      | 8.1    | 446      | 10.4   | 357      | 8.3    | 376      | 7.8    | 1,477    | 8.6    |
| 45-49 years                     | 226      | 6.1    | 280      | 6.6    | 335      | 7.8    | 308      | 6.4    | 1,149    | 6.7    |
| <b>Cohabitation</b>             |          |        |          |        |          |        |          |        |          |        |
| Not married                     | 1,280    | 34.8   | 1,672    | 39.1   | 1,583    | 36.6   | 1,985    | 41.3   | 6,519    | 38.2   |
| Live together                   | 2,010    | 54.6   | 2,173    | 50.8   | 2,224    | 51.4   | 2,328    | 48.5   | 8,735    | 51.1   |
| Not living together             | 392      | 10.6   | 434      | 10.1   | 517      | 12.0   | 490      | 10.2   | 1,832    | 10.7   |
| <b>Had sex last 4 weeks</b>     |          |        |          |        |          |        |          |        |          |        |
| Yes                             | 1,922    | 52.2   | 2,230    | 52.1   | 2,709    | 62.7   | 2,877    | 59.9   | 9,737    | 57.0   |
| No                              | 1,760    | 47.8   | 2,049    | 47.9   | 1,615    | 37.3   | 1,925    | 40.1   | 7,349    | 43.0   |
| <b>Visited by health worker</b> |          |        |          |        |          |        |          |        |          |        |
| Yes                             | 415      | 11.3   | 553      | 12.9   | 455      | 10.5   | 465      | 9.7    | 1,888    | 11.0   |
| No                              | 3,267    | 88.7   | 3,726    | 87.1   | 3,869    | 89.5   | 4,337    | 90.3   | 15,199   | 89.0   |
| <b>FP message</b>               |          |        |          |        |          |        |          |        |          |        |
| Yes                             | 3,190    | 86.6   | 3,743    | 87.5   | 3,807    | 88.1   | 4,254    | 88.6   | 14,993   | 87.7   |
| No                              | 492      | 13.4   | 536      | 12.5   | 517      | 11.9   | 549      | 11.4   | 2,093    | 12.3   |
| <b>Desire to postpone</b>       |          |        |          |        |          |        |          |        |          |        |
| Yes                             | 1,175    | 31.9   | 1,502    | 35.1   | 1,513    | 35.0   | 1,867    | 38.9   | 6,057    | 35.4   |
| No                              | 2,506    | 68.1   | 2,777    | 64.9   | 2,811    | 65.0   | 2,936    | 61.1   | 11,029   | 64.6   |
|                                 | Mean /SD | Median | Mean /SD | Median | Mean /SD | Median | Mean /SD | Median | Mean /SD | Median |
| <b>Parity</b>                   | 2.5/2.2  | 2.1    | 2.4/2.3  | 2.0    | 2.4/2.2  | 2.0    | 2.2/2.3  | 1.7    | 2.4/2.3  | 1.9    |
| <b>Distance</b>                 | 2.1/2.7  | 1.4    | 1.8/1.6  | 1.3    | 1.6/2.1  | 1.2    | 1.7/2.3  | 1.2588 | 1.8/2.2  | 1.3    |
| <b>Total</b>                    | 3,682    | 100.0  | 4,279    | 100.0  | 4,323    | 100.0  | 4,802    | 100.0  | 17,086   | 100.0  |

Note: Sample of females 15 to 49 years of age. See Table 1 for variable definitions.

Table 2d: Sample Characteristics for Uganda PMA Rounds 1-4

| Indicator                       | Round    |        |          |        |          |        |          |         |          |        |
|---------------------------------|----------|--------|----------|--------|----------|--------|----------|---------|----------|--------|
|                                 | 1        |        | 2        |        | 3        |        | 4        |         | Total    |        |
|                                 | No.      | %      | No.      | %      | No.      | %      | No.      | %       | No.      | %      |
| <b>Modern contraceptive use</b> |          |        |          |        |          |        |          |         |          |        |
| Yes                             | 754      | 21.0   | 939      | 26.3   | 939      | 25.9   | 1,025    | 27.5    | 3,657    | 25.2   |
| No                              | 2,838    | 79.0   | 2,628    | 73.7   | 2,691    | 74.1   | 2,705    | 72.5    | 10,861   | 74.8   |
| <b>Residence</b>                |          |        |          |        |          |        |          |         |          |        |
| Rural                           | 2,859    | 79.6   | 2,810    | 78.8   | 2,874    | 79.2   | 2,981    | 79.9    | 11,524   | 79.4   |
| Urban                           | 521      | 14.5   | 528      | 14.8   | 519      | 14.3   | 514      | 13.8    | 2,082    | 14.3   |
| Metropolitan                    | 212      | 5.9    | 228      | 6.4    | 237      | 6.5    | 236      | 6.3     | 912      | 6.3    |
| <b>Education</b>                |          |        |          |        |          |        |          |         |          |        |
| No education                    | 493      | 13.7   | 344      | 9.6    | 357      | 9.8    | 340      | 9.1     | 1,533    | 10.6   |
| Primary school                  | 724      | 20.2   | 742      | 20.8   | 752      | 20.7   | 790      | 21.2    | 3,008    | 20.7   |
| Secondary school                | 2,375    | 66.1   | 2,480    | 69.6   | 2,522    | 69.5   | 2,600    | 69.7    | 9,977    | 68.7   |
| <b>Wealth quintile</b>          |          |        |          |        |          |        |          |         |          |        |
| Poorest                         | 654      | 18.2   | 607      | 17.0   | 675      | 18.6   | 716      | 19.2    | 2,651    | 18.3   |
| Poorer                          | 661      | 18.4   | 660      | 18.5   | 675      | 18.6   | 693      | 18.6    | 2,688    | 18.5   |
| Middle                          | 702      | 19.6   | 746      | 20.9   | 729      | 20.1   | 754      | 20.2    | 2,931    | 20.2   |
| Richer                          | 771      | 21.5   | 751      | 21.1   | 755      | 20.8   | 759      | 20.4    | 3,037    | 20.9   |
| Richest                         | 803      | 22.4   | 802      | 22.5   | 797      | 21.9   | 808      | 21.7    | 3,211    | 22.1   |
| <b>Last child died</b>          |          |        |          |        |          |        |          |         |          |        |
| Yes                             | 79       | 2.2    | 63       | 1.8    | 88       | 2.4    | 102      | 2.7     | 332      | 2.3    |
| No                              | 3,512    | 97.8   | 3,503    | 98.2   | 3,542    | 97.6   | 3,628    | 97.3    | 14,186   | 97.7   |
| <b>Age group</b>                |          |        |          |        |          |        |          |         |          |        |
| 15-19 years                     | 754      | 21.0   | 802      | 22.5   | 742      | 20.4   | 767      | 20.5    | 3,064    | 21.1   |
| 20-24 years                     | 757      | 21.1   | 759      | 21.3   | 834      | 23.0   | 790      | 21.2    | 3,140    | 21.6   |
| 25-29 years                     | 678      | 18.9   | 610      | 17.1   | 686      | 18.9   | 639      | 17.1    | 2,612    | 18.0   |
| 30-34 years                     | 490      | 13.6   | 470      | 13.2   | 467      | 12.9   | 532      | 14.3    | 1,959    | 13.5   |
| 35-39 years                     | 392      | 10.9   | 396      | 11.1   | 373      | 10.3   | 415      | 11.1    | 1,576    | 10.9   |
| 40-44 years                     | 314      | 8.7    | 313      | 8.8    | 317      | 8.7    | 333      | 8.9     | 1,276    | 8.8    |
| 45-49 years                     | 207      | 5.8    | 217      | 6.1    | 213      | 5.9    | 255      | 6.8     | 892      | 6.1    |
| <b>Cohabitation</b>             |          |        |          |        |          |        |          |         |          |        |
| Not married                     | 1,268    | 35.3   | 1,288    | 36.1   | 1,255    | 34.6   | 1,213    | 32.5    | 5,025    | 34.6   |
| Live together                   | 1,993    | 55.5   | 1,941    | 54.4   | 2,082    | 57.4   | 2,115    | 56.7    | 8,131    | 56.0   |
| Not live together               | 330      | 9.2    | 337      | 9.5    | 293      | 8.1    | 403      | 10.8    | 1,362    | 9.4    |
| <b>Had sex last 4 weeks</b>     |          |        |          |        |          |        |          |         |          |        |
| Yes                             | 1,914    | 53.3   | 1,985    | 55.7   | 2,164    | 59.6   | 2,254    | 60.4    | 8,317    | 57.3   |
| No                              | 1,677    | 46.7   | 1,581    | 44.3   | 1,466    | 40.4   | 1,476    | 39.6    | 6,200    | 42.7   |
| <b>Visited by health worker</b> |          |        |          |        |          |        |          |         |          |        |
| Yes                             | 607      | 16.9   | 588      | 16.5   | 599      | 16.5   | 582      | 15.6    | 2,375    | 16.4   |
| No                              | 2,985    | 83.1   | 2,978    | 83.5   | 3,032    | 83.5   | 3,148    | 84.4    | 12,143   | 83.6   |
| <b>FP message</b>               |          |        |          |        |          |        |          |         |          |        |
| Yes                             | 2,929    | 81.5   | 2,849    | 79.9   | 2,893    | 79.7   | 3,021    | 81.0    | 11,691   | 80.5   |
| No                              | 663      | 18.5   | 717      | 20.1   | 738      | 20.3   | 709      | 19.0    | 2,827    | 19.5   |
| <b>Desire to postpone</b>       |          |        |          |        |          |        |          |         |          |        |
| Yes                             | 989      | 27.5   | 1,097    | 30.8   | 1,081    | 29.8   | 1,156    | 31.0    | 4,323    | 29.8   |
| No                              | 2,602    | 72.5   | 2,469    | 69.2   | 2,550    | 70.2   | 2,574    | 69.0    | 10,195   | 70.2   |
|                                 | Mean /SD | Median | Mean /SD | Median | Mean /SD | Median | Mean /SD | Median  | Mean /SD | Median |
| <b>Parity</b>                   | 3.0/2.9  | 2.3    | 2.8/2.8  | 2.0    | 2.8/2.8  | 2.1    | 3.0/2.8  | 2.4     | 2.9/2.8  | 2.2    |
| <b>Distance</b>                 | 2.7/3.3  | 1.5    | 2.6/2.9  | 1.5    | 3.7/7.8  | 1.4    | 2.7/3.5  | 1.40151 | 2.9/4.8  | 1.4    |
| <b>Total</b>                    | 3,591    | 100.0  | 3,566    | 100.0  | 3,630    | 100.0  | 3,730    | 100.0   | 14,518   | 100.0  |

Note: Sample of females 15 to 49 years of age. See Table 1 for variable definitions.

Table 2e: Sample Characteristics for Burkina Faso PMA Rounds 3-4

| Indicator                       | Round   |        |         |        |         |        |
|---------------------------------|---------|--------|---------|--------|---------|--------|
|                                 | 3       |        | 4       |        | Total   |        |
|                                 | No.     | %      | No.     | %      | No.     | %      |
| <b>Modern contraceptive use</b> |         |        |         |        |         |        |
| Yes                             | 698     | 21.6   | 699     | 21.9   | 1,398   | 21.7   |
| No                              | 2,539   | 78.4   | 2,492   | 78.1   | 5,031   | 78.3   |
| <b>Residence</b>                |         |        |         |        |         |        |
| Rural                           | 2,401   | 74.2   | 2,386   | 74.8   | 4,787   | 74.5   |
| Urban                           | 430     | 13.3   | 414     | 13.0   | 844     | 13.1   |
| Metropolitan                    | 406     | 12.5   | 392     | 12.3   | 798     | 12.4   |
| <b>Schooling</b>                |         |        |         |        |         |        |
| No education                    | 2,036   | 62.9   | 2,058   | 64.5   | 4,094   | 63.7   |
| Primary school                  | 574     | 17.7   | 514     | 16.1   | 1,088   | 16.9   |
| Secondary school                | 627     | 19.4   | 620     | 19.4   | 1,247   | 19.4   |
| <b>Wealth tertile</b>           |         |        |         |        |         |        |
| Poorest                         | 1,159   | 35.8   | 1,105   | 34.6   | 2,264   | 35.2   |
| Middle                          | 984     | 30.4   | 1,039   | 32.6   | 2,022   | 31.5   |
| Richest                         | 1,094   | 33.8   | 1,047   | 32.8   | 2,142   | 33.3   |
| <b>Last child died</b>          |         |        |         |        |         |        |
| Yes                             | 91      | 2.8    | 75      | 2.3    | 166     | 2.6    |
| No                              | 3,146   | 97.2   | 3,116   | 97.7   | 6,262   | 97.4   |
| <b>Age group</b>                |         |        |         |        |         |        |
| 15-19 years                     | 774     | 23.9   | 694     | 21.8   | 1,468   | 22.8   |
| 20-24 years                     | 585     | 18.1   | 549     | 17.2   | 1,134   | 17.6   |
| 25-29 years                     | 582     | 18.0   | 556     | 17.4   | 1,138   | 17.7   |
| 30-34 years                     | 422     | 13.0   | 464     | 14.5   | 886     | 13.8   |
| 35-39 years                     | 393     | 12.1   | 405     | 12.7   | 799     | 12.4   |
| 40-44 years                     | 263     | 8.1    | 293     | 9.2    | 557     | 8.7    |
| 45-49 years                     | 218     | 6.7    | 229     | 7.2    | 447     | 6.9    |
| <b>Cohabitation</b>             |         |        |         |        |         |        |
| Not married                     | 821     | 25.4   | 781     | 24.5   | 1,602   | 24.9   |
| Live together                   | 2,125   | 65.7   | 2,137   | 67.0   | 4,263   | 66.3   |
| Not live together               | 291     | 9.0    | 273     | 8.5    | 564     | 8.8    |
| <b>Had sex last 4 weeks</b>     |         |        |         |        |         |        |
| Yes                             | 1,835   | 56.7   | 1,824   | 57.1   | 3,659   | 56.9   |
| No                              | 1,402   | 43.3   | 1,367   | 42.9   | 2,769   | 43.1   |
| <b>Visited by health worker</b> |         |        |         |        |         |        |
| Yes                             | 482     | 14.9   | 629     | 19.7   | 1,110   | 17.3   |
| No                              | 2,755   | 85.1   | 2,562   | 80.3   | 5,318   | 82.7   |
| <b>FP message</b>               |         |        |         |        |         |        |
| Yes                             | 1,991   | 61.5   | 1,959   | 61.4   | 3,950   | 61.4   |
| No                              | 1,246   | 38.5   | 1,232   | 38.6   | 2,478   | 38.6   |
| <b>Desire to postpone</b>       |         |        |         |        |         |        |
| Yes                             | 1,285   | 39.7   | 1,257   | 39.4   | 2,541   | 39.5   |
| No                              | 1,952   | 60.3   | 1,935   | 60.6   | 3,887   | 60.5   |
|                                 | Mean/SD | Median | Mean/SD | Median | Mean/SD | Median |
| <b>Parity</b>                   | 2.5/2.6 | 1.8    | 2.9/2.7 | 2.3    | 2.7/2.7 | 2.0    |
| <b>Distance</b>                 | 3.8/8.0 | 1.3    | 2.8/3.5 | 1.4    | 3.3/6.2 | 1.4    |
| <b>Total</b>                    | 3,237   | 100.0  | 3,191   | 100.0  | 6,428   | 100.0  |

Note: Sample of females 15 to 49 years of age. See Table 1 for variable definitions.



Table 3: Direct estimates of the modern contraceptive prevalence rate and 95% uncertainty intervals in Ghana, Ethiopia, Kenya, Uganda and Burkina Faso by round

| Country  | Region            | Round 1     |             |             | Round 2     |             |             | Round 3     |             |             | Round 4     |             |             | Change: round 1 to 4 |
|----------|-------------------|-------------|-------------|-------------|-------------|-------------|-------------|-------------|-------------|-------------|-------------|-------------|-------------|----------------------|
|          |                   | Mean        | Lower       | Upper       | Mean        | Lower       | Upper       | Mean        | Lower       | Upper       | Mean        | Lower       | Upper       |                      |
| Ghana    | Ashanti           | 16.1        | 13.7        | 18.7        | 18.3        | 15.7        | 21.2        | 17.1        | 14.6        | 19.8        | 23.7        | 21.1        | 26.4        | 7.6                  |
|          | Brong-Ahafo       | 17.4        | 13.9        | 21.3        | 16.2        | 12.4        | 20.7        | 22.8        | 18.5        | 27.6        | 24.3        | 19.9        | 29.2        | 7.0                  |
|          | Central           | 16.0        | 12.4        | 20.1        | 23.1        | 18.3        | 28.4        | 21.8        | 18.3        | 25.5        | 25.8        | 22.6        | 29.1        | 9.8                  |
|          | Eastern           | 13.5        | 10.4        | 17.2        | 12.3        | 9.0         | 16.4        | 18.8        | 14.4        | 23.9        | 24.4        | 19.8        | 29.4        | 10.9                 |
|          | Greater-Accra     | 15.0        | 12.6        | 17.7        | 15.9        | 13.1        | 19.0        | 19.9        | 17.2        | 22.9        | 22.8        | 20.1        | 25.8        | 7.8                  |
|          | Northern          | 7.7         | 5.4         | 10.6        | 5.6         | 3.5         | 8.4         | 10.3        | 7.3         | 13.8        | 13.3        | 10.2        | 16.9        | 5.5                  |
|          | Upper-East        | 19.3        | 13.7        | 25.9        | 17.1        | 11.6        | 23.7        | 16.1        | 11.9        | 21.2        | 32.4        | 27.5        | 37.5        | 13.1                 |
|          | Upper-West        | 26.5        | 18.7        | 35.6        | 19.6        | 13.0        | 27.8        | 24.7        | 19.0        | 31.2        | 34.7        | 28.2        | 41.6        | 8.1                  |
|          | Volta             | 8.8         | 5.8         | 12.6        | 7.1         | 4.4         | 10.8        | 15.5        | 10.8        | 21.2        | 15.7        | 11.4        | 20.9        | 6.9                  |
|          | Western           | 6.0         | 3.7         | 9.1         | 7.2         | 4.7         | 10.6        | 13.9        | 10.7        | 17.6        | 12.1        | 9.0         | 15.8        | 6.0                  |
|          | <b>ALL</b>        | <b>14.0</b> | <b>12.9</b> | <b>15.1</b> | <b>14.4</b> | <b>13.2</b> | <b>15.5</b> | <b>18.1</b> | <b>17.0</b> | <b>19.3</b> | <b>22.8</b> | <b>21.7</b> | <b>24.0</b> | <b>8.8</b>           |
| Ethiopia | Addis Ababa       | 20.6        | 16.7        | 25.0        | 22.8        | 18.3        | 27.8        | 29.1        | 24.3        | 34.1        | 27.0        | 22.3        | 32.1        | 6.4                  |
|          | Afar              | 3.0         | 0.1         | 13.9        | 6.5         | 1.4         | 17.4        | 24.9        | 14.3        | 38.4        | 13.2        | 6.3         | 23.3        | 10.2                 |
|          | Amhara            | 35.9        | 33.1        | 38.8        | 35.6        | 33.0        | 38.3        | 31.8        | 29.5        | 34.2        | 35.3        | 32.9        | 37.8        | -0.6                 |
|          | Benishangul Gumuz | 10.9        | 4.3         | 21.7        | 11.4        | 5.5         | 20.1        | 16.2        | 9.3         | 25.4        | 14.9        | 8.4         | 23.9        | 4.0                  |
|          | Dire Dawa         | 12.5        | 0.8         | 45.3        | 28.5        | 8.0         | 58.8        | 29.3        | 12.2        | 52.2        | 37.3        | 19.0        | 58.8        | 24.8                 |
|          | Ethiopia Somali   | 7.5         | 0.9         | 24.3        | 5.9         | 0.7         | 19.7        | 6.1         | 1.0         | 18.3        | 6.7         | 1.3         | 19.1        | -0.8                 |
|          | Gambella          | 23.2        | 10.0        | 41.8        | 23.4        | 12.1        | 38.4        | 24.4        | 12.2        | 40.6        | 24.7        | 12.1        | 41.6        | 1.5                  |
|          | Harari            | 28.3        | 11.4        | 51.4        | 20.2        | 5.3         | 45.6        | 21.2        | 7.5         | 42.4        | 22.4        | 7.4         | 45.5        | -5.9                 |
|          | Oromiya           | 18.6        | 16.9        | 20.3        | 21.1        | 19.5        | 22.8        | 23.0        | 21.0        | 25.1        | 21.8        | 19.8        | 23.8        | 3.2                  |
|          | SNNPR             | 23.7        | 21.2        | 26.3        | 22.2        | 20.1        | 24.5        | 27.6        | 25.4        | 29.8        | 28.0        | 25.9        | 30.2        | 4.3                  |
|          | Tigray            | 20.1        | 16.2        | 24.4        | 22.9        | 18.8        | 27.3        | 22.9        | 19.1        | 27.0        | 22.1        | 18.4        | 26.2        | 2.0                  |
|          | <b>ALL</b>        | <b>23.4</b> | <b>22.3</b> | <b>24.6</b> | <b>24.4</b> | <b>23.3</b> | <b>25.5</b> | <b>26.8</b> | <b>25.6</b> | <b>27.9</b> | <b>27.0</b> | <b>25.9</b> | <b>28.2</b> | <b>3.6</b>           |
| Kenya    | Bungoma           | 43.9        | 38.2        | 49.7        | 37.1        | 32.1        | 42.2        | 45.3        | 40.3        | 50.4        | 43.5        | 38.7        | 48.5        | -0.3                 |
|          | Kericho           | 39.8        | 35.4        | 44.5        | 37.8        | 33.7        | 42.1        | 42.9        | 38.7        | 47.1        | 38.9        | 35.2        | 42.8        | -0.9                 |
|          | Kiambu            | 43.4        | 38.6        | 48.2        | 48.4        | 43.7        | 53.1        | 44.9        | 40.5        | 49.4        | 50.0        | 45.6        | 54.4        | 6.6                  |
|          | Kilifi            | 27.9        | 23.6        | 32.4        | 25.9        | 22.1        | 30.0        | 32.0        | 27.9        | 36.3        | 31.4        | 27.7        | 35.2        | 3.5                  |
|          | Kitui             | 39.8        | 34.9        | 44.8        | 39.6        | 35.2        | 44.1        | 51.0        | 46.6        | 55.3        | 53.1        | 48.9        | 57.3        | 13.3                 |

|              |                   |             |             |             |             |             |             |             |             |             |             |             |             |            |
|--------------|-------------------|-------------|-------------|-------------|-------------|-------------|-------------|-------------|-------------|-------------|-------------|-------------|-------------|------------|
| Uganda       | Nairobi           | 45.3        | 41.6        | 49.0        | 41.4        | 37.9        | 45.0        | 51.3        | 47.6        | 54.9        | 48.6        | 45.1        | 52.2        | 3.3        |
|              | Nandi             | 44.6        | 39.2        | 50.2        | 44.5        | 39.7        | 49.3        | 50.1        | 45.2        | 55.1        | 47.6        | 42.9        | 52.4        | 3.0        |
|              | Nyamira           | 50.0        | 44.1        | 56.0        | 52.2        | 46.6        | 57.9        | 58.5        | 52.9        | 64.0        | 56.7        | 51.2        | 62.0        | 6.6        |
|              | Siaya             | 41.9        | 36.7        | 47.3        | 40.1        | 35.4        | 44.9        | 45.0        | 40.1        | 50.0        | 50.0        | 45.4        | 54.6        | 8.1        |
|              | <b>ALL</b>        | <b>41.7</b> | <b>40.1</b> | <b>43.3</b> | <b>40.3</b> | <b>38.8</b> | <b>41.8</b> | <b>46.5</b> | <b>45.0</b> | <b>48.0</b> | <b>46.0</b> | <b>44.5</b> | <b>47.4</b> | <b>4.3</b> |
|              | Central1          | 25.8        | 21.6        | 30.3        | 35.1        | 30.5        | 39.9        | 34.8        | 30.1        | 39.7        | 29.2        | 25.0        | 33.7        | 3.5        |
|              | Central2          | 18.9        | 14.9        | 23.6        | 25.9        | 21.1        | 31.1        | 32.3        | 27.3        | 37.6        | 30.6        | 26.0        | 35.5        | 11.7       |
|              | East_Central      | 17.3        | 13.8        | 21.3        | 21.6        | 17.8        | 25.7        | 27.1        | 23.1        | 31.5        | 26.5        | 22.4        | 30.9        | 9.2        |
|              | Eastern           | 19.4        | 16.3        | 22.8        | 26.4        | 22.9        | 30.2        | 21.9        | 18.6        | 25.5        | 27.3        | 23.9        | 31.0        | 7.9        |
|              | Kampala           | 29.1        | 23.1        | 35.7        | 38.2        | 31.9        | 44.8        | 38.9        | 32.6        | 45.4        | 34.0        | 28.0        | 40.4        | 4.9        |
|              | Karamoja          | 10.7        | 5.8         | 17.7        | 4.5         | 1.6         | 9.8         | 4.7         | 1.6         | 10.2        | 3.9         | 1.1         | 9.6         | -6.8       |
|              | North             | 24.3        | 19.8        | 29.2        | 27.1        | 22.6        | 31.9        | 23.0        | 18.9        | 27.5        | 25.8        | 21.4        | 30.5        | 1.5        |
|              | South_West        | 24.5        | 20.5        | 28.9        | 25.2        | 21.2        | 29.5        | 24.0        | 19.9        | 28.5        | 32.9        | 28.2        | 37.9        | 8.4        |
|              | West_Nile         | 7.1         | 4.5         | 10.5        | 14.5        | 10.5        | 19.3        | 12.3        | 8.6         | 16.9        | 17.3        | 13.1        | 22.2        | 10.3       |
| Western      | 26.5              | 22.5        | 30.9        | 30.9        | 26.4        | 35.6        | 27.8        | 23.8        | 32.2        | 29.8        | 25.6        | 34.2        | 3.2         |            |
| <b>ALL</b>   | <b>21.0</b>       | <b>19.7</b> | <b>22.4</b> | <b>26.3</b> | <b>24.9</b> | <b>27.8</b> | <b>25.9</b> | <b>24.5</b> | <b>27.3</b> | <b>27.5</b> | <b>26.1</b> | <b>29.0</b> | <b>6.5</b>  |            |
| Burkina Faso | Boucle du Mouhoun |             |             |             |             |             |             | 18.6        | 14.9        | 22.9        | 20.0        | 16.2        | 24.1        | 1.3        |
|              | Cascades          |             |             |             |             |             |             | 26.5        | 19.9        | 34.0        | 19.1        | 13.3        | 26.2        | -7.3       |
|              | Centre            |             |             |             |             |             |             | 30.3        | 25.9        | 35.0        | 36.1        | 31.3        | 41.1        | 5.8        |
|              | Centre Est        |             |             |             |             |             |             | 11.8        | 7.8         | 17.1        | 18.5        | 13.1        | 24.9        | 6.6        |
|              | Centre Nord       |             |             |             |             |             |             | 18.8        | 14.7        | 23.6        | 15.1        | 11.3        | 19.7        | -3.7       |
|              | Centre Ouest      |             |             |             |             |             |             | 23.2        | 18.5        | 28.4        | 20.6        | 16.1        | 25.7        | -2.6       |
|              | Centre Sud        |             |             |             |             |             |             | 27.7        | 19.5        | 37.2        | 29.8        | 20.2        | 40.9        | 2.0        |
|              | Est               |             |             |             |             |             |             | 17.7        | 14.2        | 21.7        | 23.6        | 19.1        | 28.6        | 5.9        |
|              | Haut Bassins      |             |             |             |             |             |             | 28.0        | 23.0        | 33.3        | 30.9        | 25.8        | 36.4        | 2.9        |
|              | Nord              |             |             |             |             |             |             | 21.1        | 15.5        | 27.8        | 18.8        | 14.2        | 24.1        | -2.3       |
|              | Plateau Central   |             |             |             |             |             |             | 26.0        | 18.1        | 35.3        | 14.6        | 9.0         | 22.0        | -11.4      |
|              | Sahel             |             |             |             |             |             |             | 12.7        | 8.7         | 17.8        | 10.3        | 6.7         | 14.9        | -2.4       |
|              | Sud Ouest         |             |             |             |             |             |             | 19.1        | 12.4        | 27.3        | 14.7        | 8.6         | 22.7        | -4.4       |
|              | <b>ALL</b>        |             |             |             |             |             |             | <b>21.6</b> | <b>20.2</b> | <b>23.0</b> | <b>21.9</b> | <b>20.5</b> | <b>23.4</b> | <b>0.3</b> |

Note: Lower and upper denote the boundaries of the 95% uncertainty interval for direct estimate

## Covariate selection

Effective prediction depends on striking a balance between bias and stability. A saturated model can reduce bias but at the cost or risk of unstable predictions; a prediction based on too few covariates, or their transforms, is relatively stable but at the cost or risk of increased bias. This is particularly true in our study given sampling and measurement errors in the covariates. Our selection criteria for covariates are based on: (1) theory; (2) a review of previous empirical studies; and (3) model assessment. We also use a deviance information criterion (DIC) in selecting several variables and specifying their definitions. For example, the literature indicates that survival status of previous births influences women's contraceptive use.<sup>1</sup> There are two possible ways to measure previous child survival--the number of children who have died or whether the last child born in the preceding two years is still alive. The model with the latter measurement showed a smaller DIC and therefore was used in the study. Based on these criteria, we arrived at a list of 12 covariates: residence, schooling, wealth quintile, child survival, age, cohabitation, recent sex, health worker visit, family planning message, fertility intention, parity, and distance to the nearest facility. See the appendix for their definitions (p 3)

## Accounting for survey weight

While there are a variety of approaches for accommodating survey sampling weights in a frequentist analysis, including reciprocal propensity weighting (e.g. the Horvitz-Thompson approach) and case-specific propensity as a covariate, the latter is most directly implementable in a Markov chain Monte Carlo context.<sup>2,3</sup> The goal is to build a model wherein the sampling process is "ignorable", i.e., that the analysis includes all variables that affect the probability of a person being included in the sample, and thereby accommodate the weights when estimating the fixed effects.

We evaluated the impact of including sampling weight as a model covariate. Including both a linear and quadratic terms did not appreciably change the population estimates and predictions compared to non-inclusion. Therefore, in the spirit of parsimony, our estimates are based on models that do not include the

sampling weight as a covariate. We account for sampling weight in the post-estimation aggregation from individual level to EA-level, regional, and national estimates.

## Model checking and assessment

We use several methodological approaches to assess the predictive performance of our model. Within-sample assessments are more optimistic than out-of-sample ones, because the former use the same data for fitting and evaluation. Technical adjustments are not generally available in this complex modeling situation. For example, if we wish to perform a chi-square test for the overall standardized residual of the model, it is difficult to determine the degrees of freedom.

The most important indicator in model diagnosis is the model residual, which is defined as the difference between the MLE and Bayesian estimates. The model residual is then standardized to eliminate the influence of level and scale and provides a metric, i.e. the standardized residual, which is comparable across models. The values and distribution of the standardized residual indicate whether the model captures the most important covariates and whether the model assumptions (e.g. structure of random effects) are reasonable. The standardized residual is based on the direct estimate and thus measures its difference from a model-based estimate. This approach is satisfactory if the direct estimates have a nearly Gaussian distribution.

However, the mCPR outcome in this study does not have a Gaussian distribution, and therefore we have to develop a new diagnostic measure,  $Z$ -value. It indicates the percentile location of the direct estimate in amongst its predictive distribution from the BHM. In general, the  $Z$ -value is less dependent on the Gaussian assumption, and it will be identical to the standardized residual if the predictive distribution is exactly Gaussian. In this study the  $Z$ -value is more appropriate than the standardized residual because the

mCPR values for many small areas are very low and could be far from following a Gaussian distribution. See webappendix (pp) for additional details.

### Z-value vs Avelogistic plots

Figures 1a-1e illustrates the distribution of Z-values versus avelogistic estimates for the four countries where each data point is an area-round (e.g. region or county 1 in round 1; region or county 1 in round 2) because the model uses area-level random effects. The data points in the right panel represent specific EA-rounds because our study interest is regional estimates. The lack of a pattern in the left panel's graphs indicates that our model performs equally well across low, middle and high-mCPR areas.

### Priors for model parameters

The following priors are used in the study. And the information has been added to the appendix.

$$\begin{aligned}
 \beta_i &\sim N(0,10000), i = 1, \dots, NX \\
 u[t, j] &\sim \begin{cases} N(0, precu[1, j]), & t = 1; & j = 1, \dots, NEA \\ N(\mu[t, j], precu[t, j]), & t = 2, \dots, NT; j = 1, \dots, NEA \end{cases} \\
 \mu[t, j] &\sim \rho * u[t - 1, j], t = 2, \dots, NT; j = 1, \dots, NEA \\
 precu[t, j] &\sim \begin{cases} 1/\tau^2, & t = 1; & j = 1, \dots, NEA \\ 1/((1 - \rho^2)\tau^2), & t = 2, \dots, NT; j = 1, \dots, NEA \end{cases} \\
 \rho &\sim Uniform(0.01, 0.99) \\
 \tau^2 &\sim Gamma(0.001, 0.001)
 \end{aligned}$$

where NX denotes the number of coefficients; NT denotes the number of rounds; NEA denotes the number of EAs.

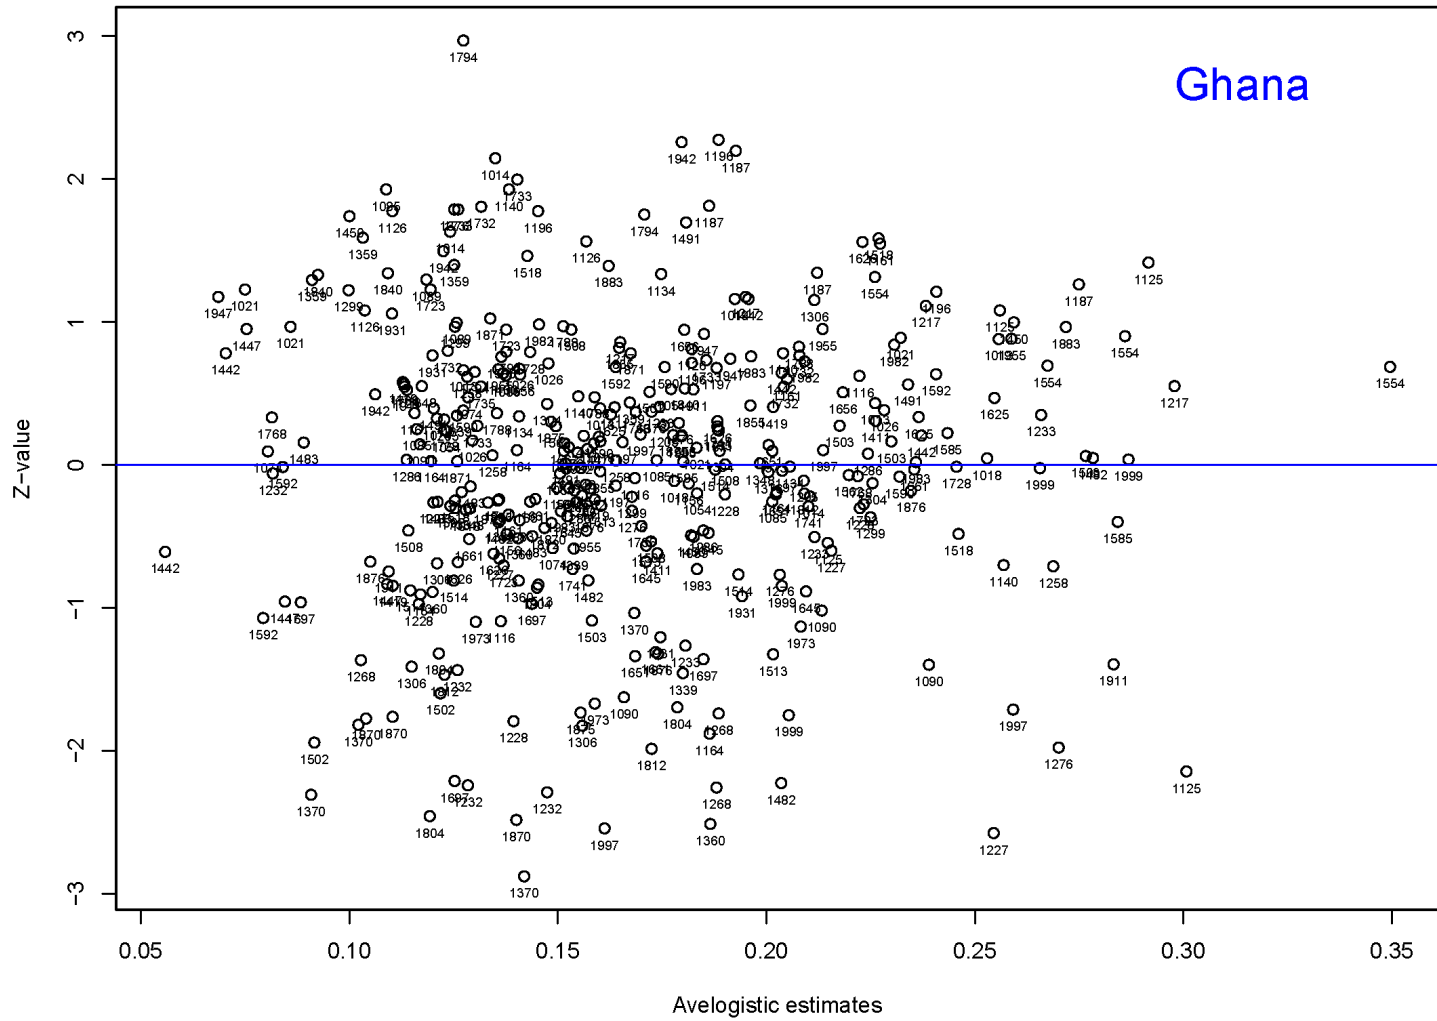

Figure 1a: Z-value vs. Avelogistic estimates: Ghana round 1-4

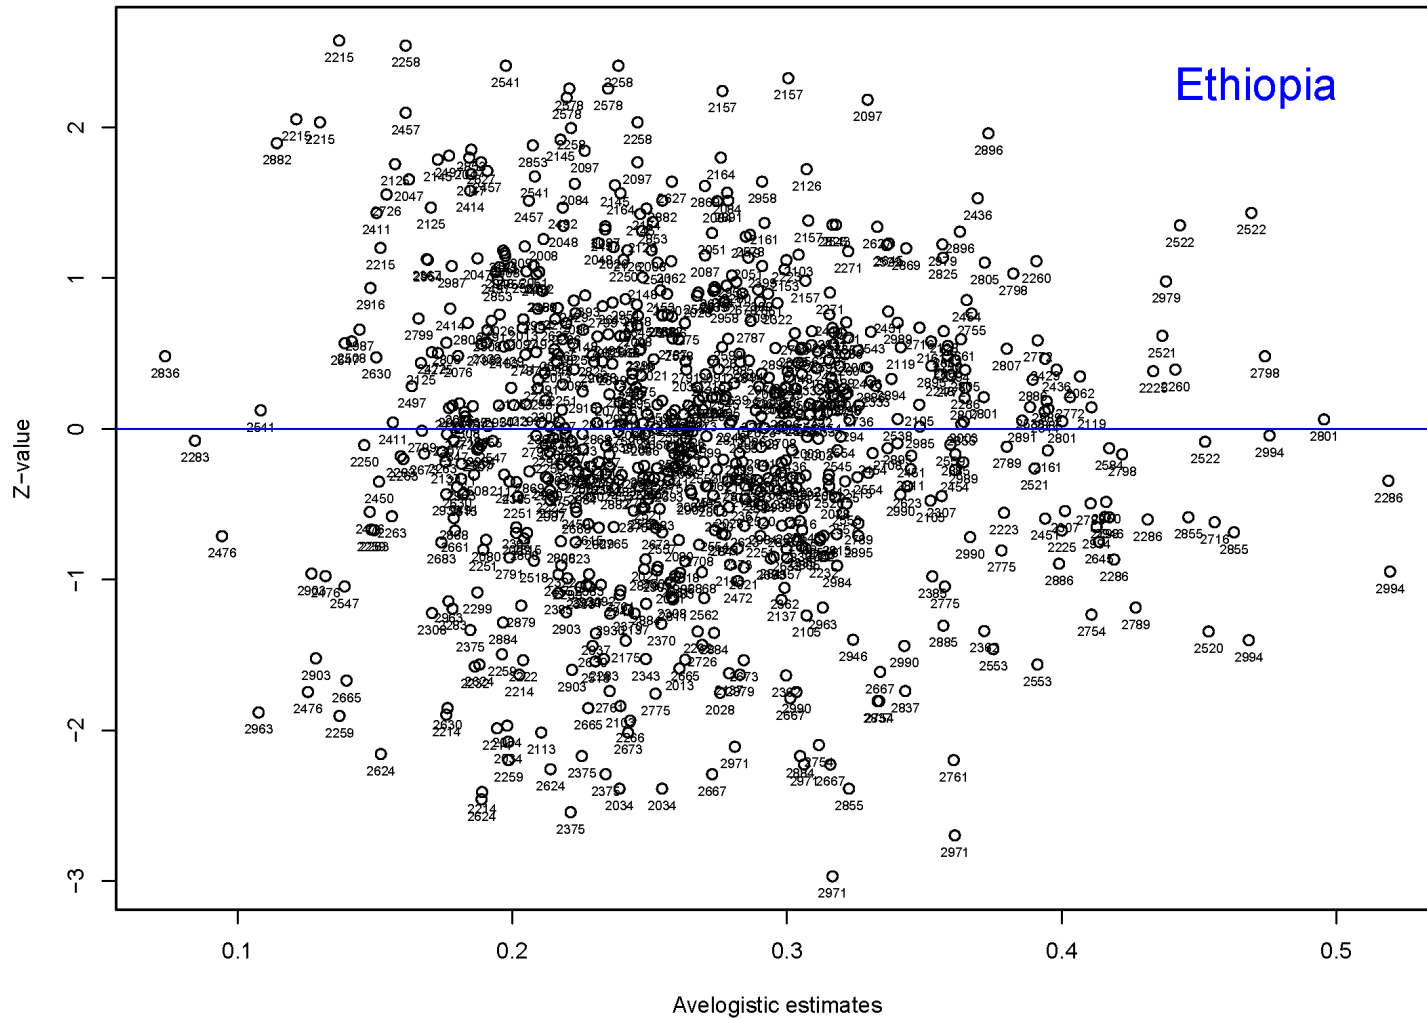

Figure 1b: Z-value vs. Avelogistic estimates: Ethiopia round 1-4

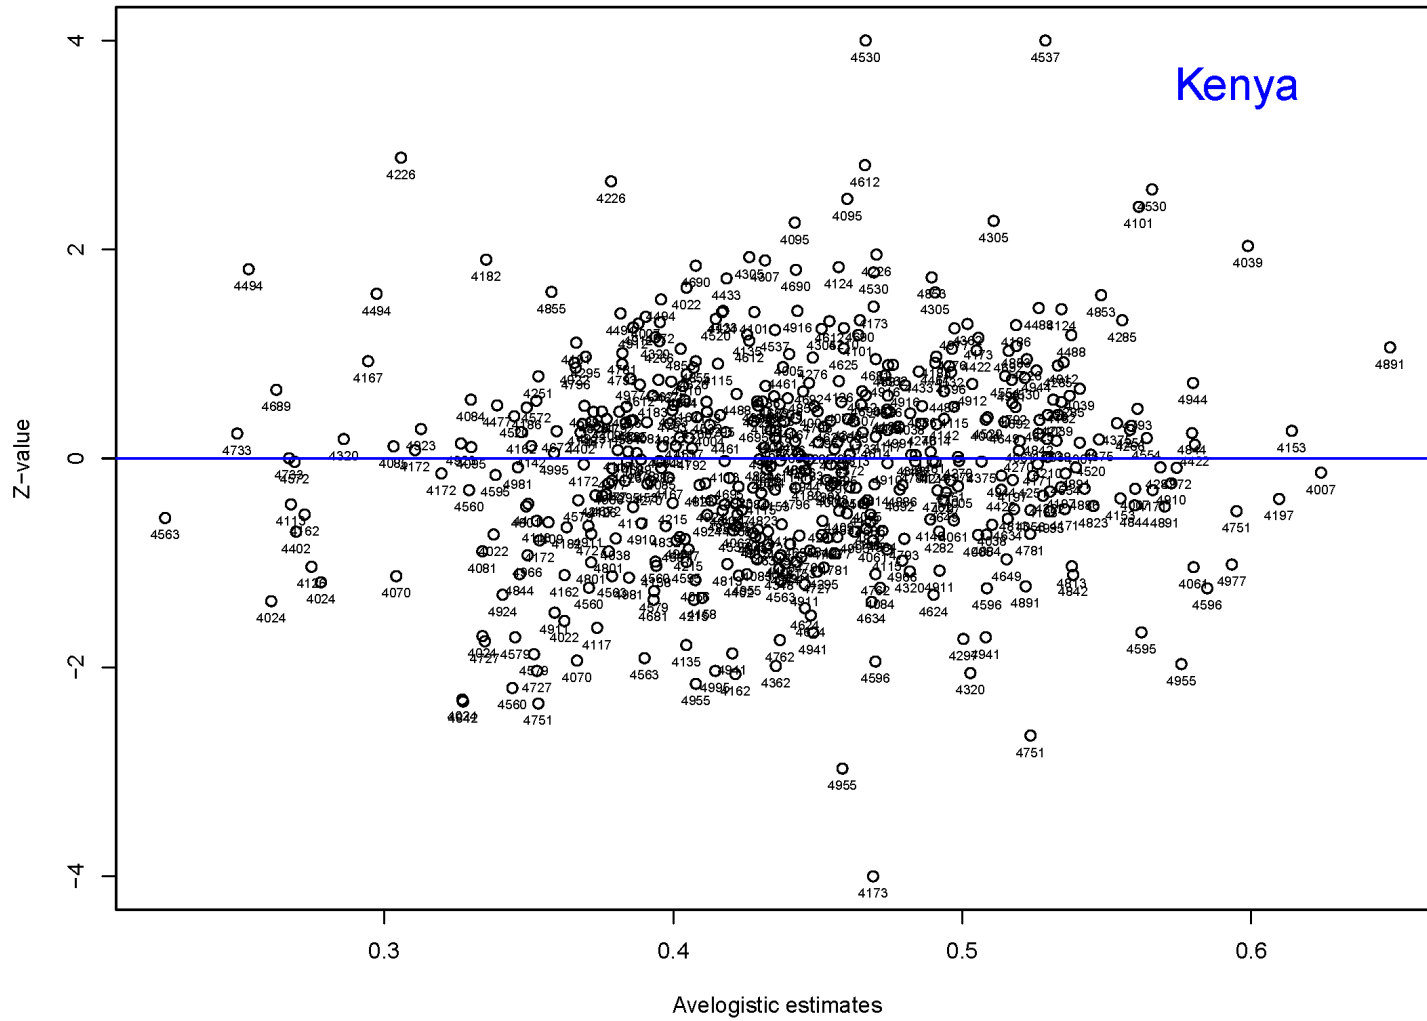

Figure 1c: Z-value vs. Avelogistic estimates: Kenya round 1-4



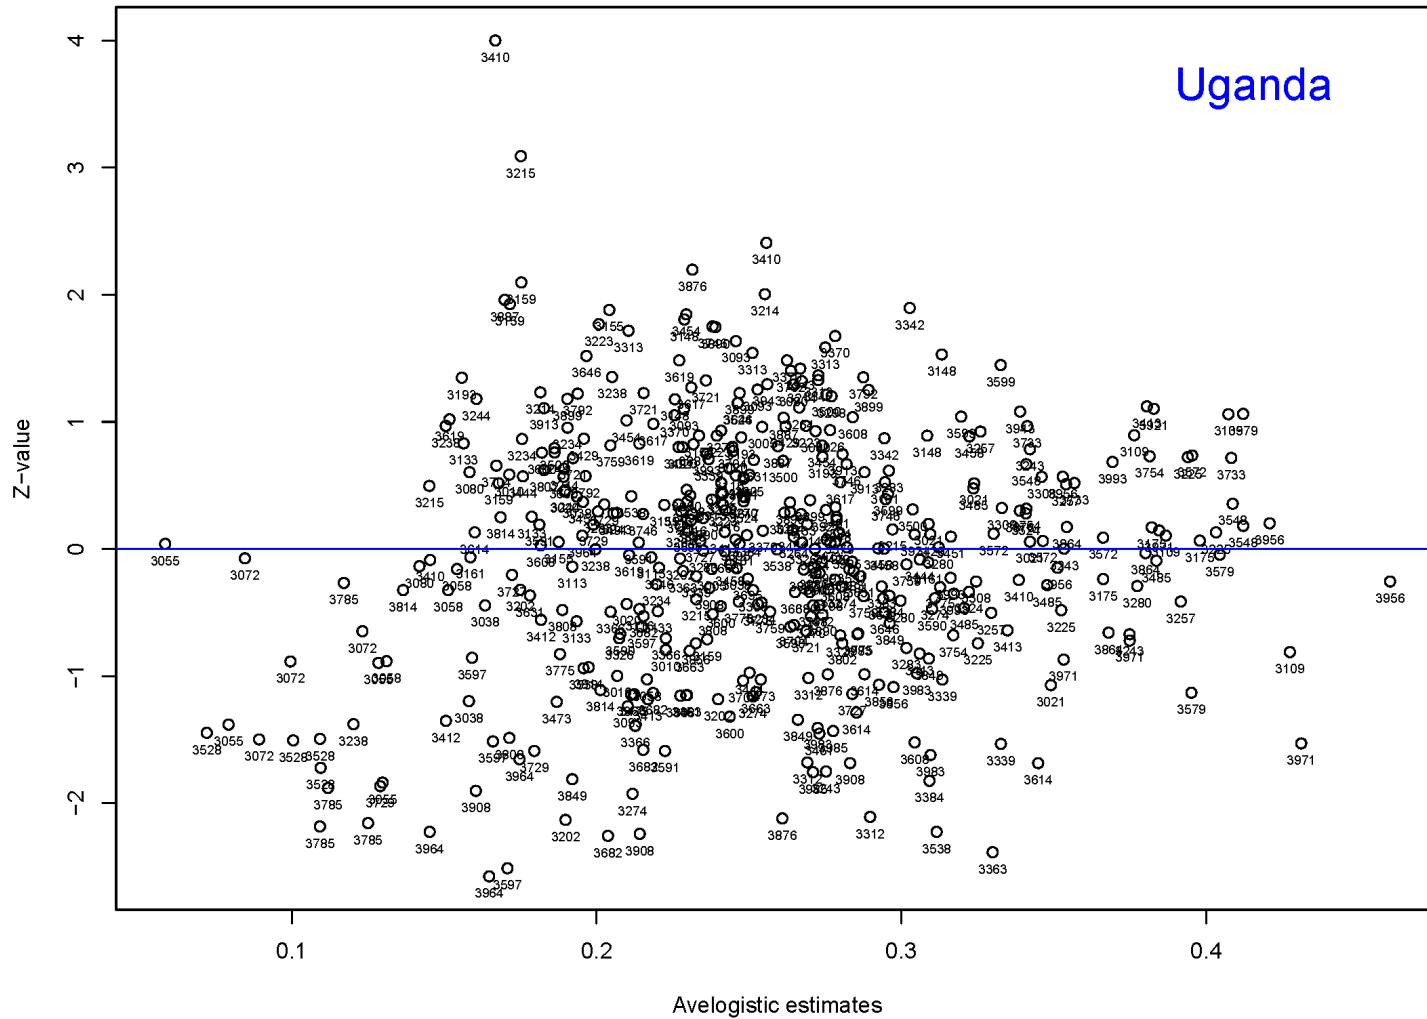

Figure 1d: Z-value vs. Avelogistic estimates: Uganda round 1-4

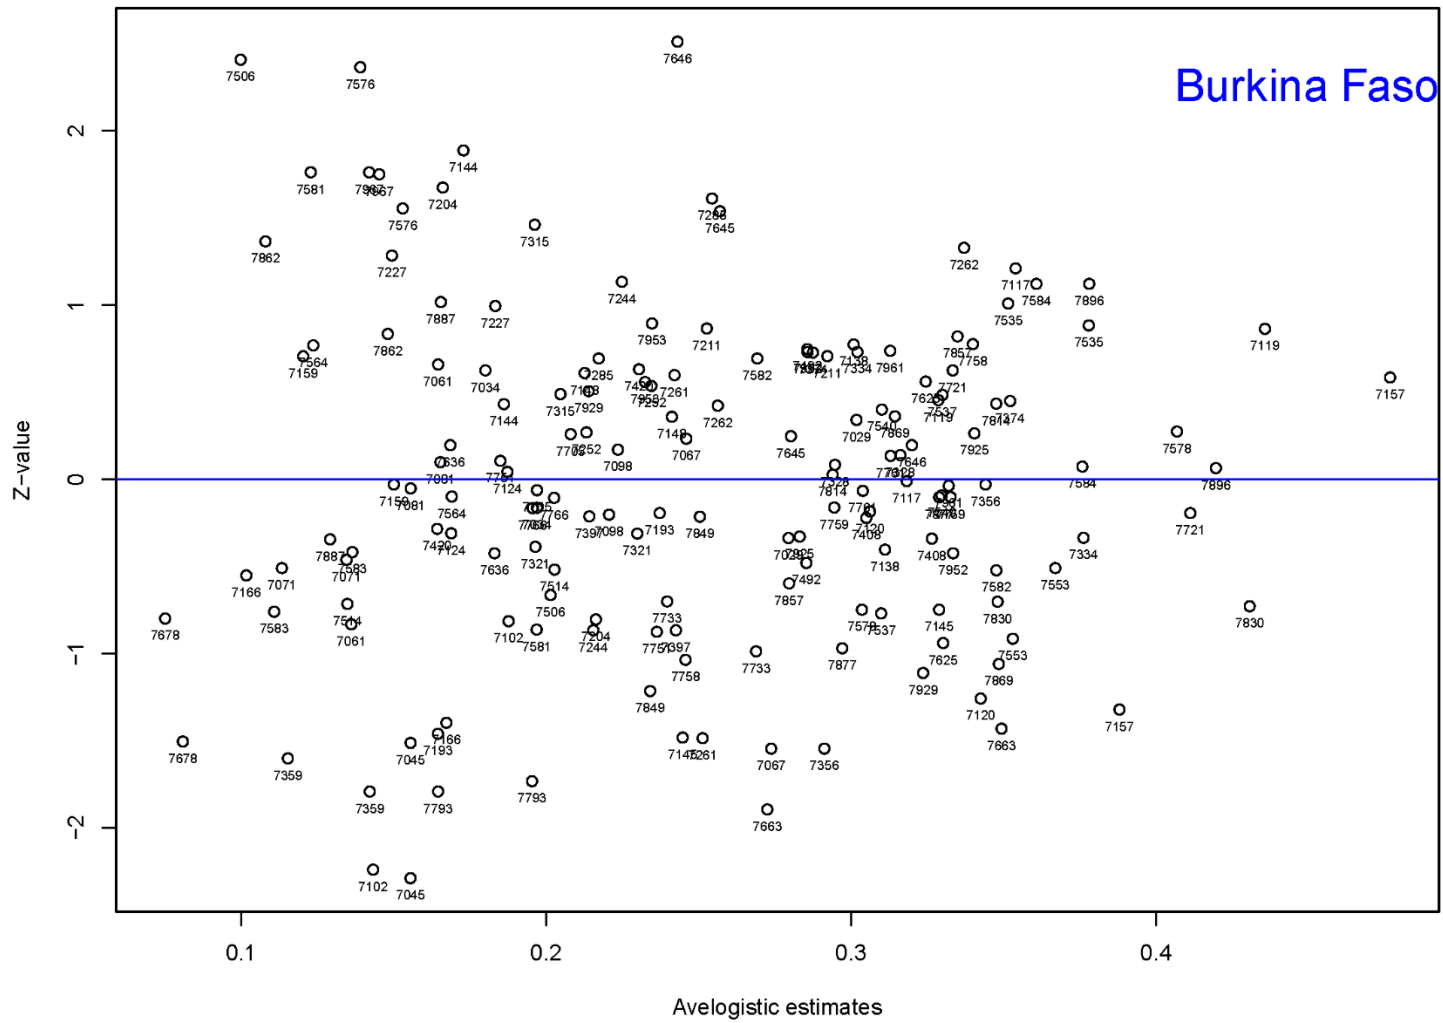

Figure 1e: Z-value vs. Avelogistic estimates: Burkina Faso round 3-4

## Shrinkage plots

In a shrinkage plot, each line denotes a subnational unit (region or county) in a survey round with the standard deviations of the direct estimates as whiskers; the middle line shows the direct estimates; and the bottom shows the predicted estimates from the BHM. The model shrinks the direct estimates toward the model-based predictions, with the shrinkage mainly determined by the uncertainty of the direct estimates.

Figures 2a-2e show the shrinkage after removing the influence of a logistic regression. Instead of using a separate logistic model, our indicator, called *avelogistic*, is based on a logistic model with the same set of covariates averaged over the posterior distribution of coefficients and random effects of the BHM. The shrinkage of the residual between direct-minus-logistic estimates toward the residual between Bayesian-minus-*avelogistic* estimates indicate the extent to which Bayesian estimates help achieve a balance between information from women's direct report of contraceptive use (i.e. direct estimates) and pure model-based prediction (i.e. *avelogistic* estimates). The balance is largely determined by the accuracy of the direct estimates, where estimates with a longer whiskers tend to shrink more, and have larger variation in random effects. The plots show that our BHMs are achieving a balance between direct and pure model-based estimates.

Table 2: Median and 95% uncertainty intervals (UI) of parameter estimates from Bayesian hierarchical models

| Parameters                     | Burkina Faso |        |       | Ethiopia |        |       | Ghana  |        |       | Kenya  |        |       | Uganda |        |       |
|--------------------------------|--------------|--------|-------|----------|--------|-------|--------|--------|-------|--------|--------|-------|--------|--------|-------|
|                                | Median       | 95% UI |       | Median   | 95% UI |       | Median | 95% UI |       | Median | 95% UI |       | Median | 95% UI |       |
| Intercept                      | -4.25        | -4.66  | -3.89 | -5.09    | -5.40  | -4.81 | -4.49  | -4.86  | -4.12 | -4.45  | -4.75  | -4.13 | -4.42  | -4.72  | -4.08 |
| Round 2                        |              |        |       | 0.07     | -0.05  | 0.19  | 0.04   | -0.15  | 0.24  | 0.00   | -0.12  | 0.12  | 0.29   | 0.15   | 0.44  |
| Round 3                        |              |        |       | 0.16     | 0.03   | 0.29  | 0.41   | 0.20   | 0.65  | 0.22   | 0.08   | 0.36  | 0.25   | 0.09   | 0.41  |
| Round 4                        | -0.04        | -0.24  | 0.17  | 0.16     | 0.02   | 0.30  | 0.64   | 0.42   | 0.88  | 0.29   | 0.15   | 0.43  | 0.32   | 0.13   | 0.48  |
| Residence (ref=rural)          | 0.82         | 0.48   | 1.17  | 0.79     | 0.47   | 1.13  | -0.02  | -0.36  | 0.30  | 0.17   | -0.05  | 0.38  | 0.25   | -0.06  | 0.59  |
| Metropolitan                   | 0.96         | 0.59   | 1.39  | 0.83     | 0.32   | 1.28  | 0.38   | -0.07  | 0.84  | 0.25   | -0.11  | 0.60  | 0.61   | 0.29   | 0.95  |
| Primary (ref=no education)     | 0.53         | 0.34   | 0.71  | 0.26     | 0.16   | 0.37  | 0.39   | 0.24   | 0.53  | 0.99   | 0.77   | 1.20  | 0.56   | 0.39   | 0.75  |
| Secondary                      | 0.79         | 0.59   | 1.00  | 0.17     | 0.04   | 0.30  | 0.54   | 0.35   | 0.72  | 1.13   | 0.90   | 1.34  | 0.70   | 0.52   | 0.92  |
| Last child died                | -0.88        | -1.39  | -0.37 | -0.70    | -1.00  | -0.41 | -0.18  | -0.68  | 0.28  | -0.68  | -1.03  | -0.34 | -0.42  | -0.73  | -0.11 |
| Parity                         | 0.25         | 0.20   | 0.29  | 0.17     | 0.14   | 0.19  | 0.22   | 0.19   | 0.25  | 0.19   | 0.17   | 0.22  | 0.12   | 0.10   | 0.15  |
| Poorer (ref=poorest)           |              |        |       | 0.11     | -0.06  | 0.28  | 0.19   | 0.02   | 0.36  | 0.12   | 0.00   | 0.22  | 0.30   | 0.14   | 0.47  |
| Middle                         | 0.00         | -0.23  | 0.23  | 0.21     | 0.02   | 0.39  | 0.13   | -0.07  | 0.33  | 0.13   | 0.01   | 0.25  | 0.38   | 0.20   | 0.57  |
| Richer                         |              |        |       | 0.37     | 0.17   | 0.58  | 0.17   | -0.06  | 0.39  | 0.21   | 0.06   | 0.36  | 0.43   | 0.26   | 0.62  |
| Richest                        | 0.12         | -0.16  | 0.39  | 0.35     | 0.13   | 0.59  | -0.04  | -0.30  | 0.21  | 0.11   | -0.07  | 0.30  | 0.50   | 0.30   | 0.72  |
| 20-24 years (ref=15-19)        | 0.89         | 0.63   | 1.15  | 0.93     | 0.79   | 1.07  | 0.97   | 0.79   | 1.15  | 1.13   | 0.98   | 1.28  | 0.76   | 0.61   | 0.92  |
| 25-29 years                    | 0.69         | 0.42   | 0.96  | 0.88     | 0.73   | 1.03  | 0.89   | 0.69   | 1.09  | 1.51   | 1.36   | 1.68  | 0.92   | 0.76   | 1.11  |
| 30-34 years                    | 0.54         | 0.23   | 0.85  | 0.56     | 0.39   | 0.73  | 0.63   | 0.42   | 0.84  | 1.37   | 1.19   | 1.55  | 0.88   | 0.68   | 1.08  |
| 35-39 years                    | -0.02        | -0.37  | 0.34  | 0.13     | -0.05  | 0.31  | 0.40   | 0.16   | 0.64  | 1.20   | 1.00   | 1.37  | 0.82   | 0.61   | 1.05  |
| 40-44 years                    | -0.16        | -0.56  | 0.24  | -0.22    | -0.44  | -0.01 | 0.03   | -0.23  | 0.30  | 0.69   | 0.48   | 0.89  | 0.61   | 0.38   | 0.87  |
| 45-49 years                    | -1.07        | -1.55  | -0.57 | -1.20    | -1.47  | -0.93 | -0.69  | -1.00  | -0.38 | -0.14  | -0.36  | 0.09  | -0.03  | -0.31  | 0.25  |
| Live together (ref=no married) | -0.02        | -0.23  | 0.21  | 0.79     | 0.67   | 0.91  | -0.14  | -0.28  | 0.00  | 0.57   | 0.47   | 0.68  | -0.01  | -0.13  | 0.12  |
| Not live together              | 0.23         | -0.06  | 0.52  | 0.77     | 0.60   | 0.95  | 0.04   | -0.11  | 0.19  | 0.72   | 0.58   | 0.85  | 0.12   | -0.04  | 0.29  |
| Had sex last 4 weeks           | 1.49         | 1.33   | 1.65  | 1.91     | 1.80   | 2.02  | 1.22   | 1.11   | 1.32  | 1.22   | 1.13   | 1.31  | 1.07   | 0.96   | 1.19  |
| Visited by health worker       | 0.43         | 0.25   | 0.61  | 0.40     | 0.31   | 0.49  | 0.59   | 0.46   | 0.72  | 0.30   | 0.18   | 0.42  | 0.29   | 0.17   | 0.41  |
| FP message                     | 0.34         | 0.16   | 0.50  | 0.35     | 0.25   | 0.44  | 0.24   | 0.12   | 0.36  | 0.14   | 0.01   | 0.26  | 0.20   | 0.07   | 0.33  |

|                    |       |       |      |      |       |      |      |       |      |      |       |      |       |       |      |
|--------------------|-------|-------|------|------|-------|------|------|-------|------|------|-------|------|-------|-------|------|
| Desire to postpone | -0.02 | -0.16 | 0.13 | 0.21 | 0.12  | 0.29 | 0.12 | 0.01  | 0.23 | 0.27 | 0.17  | 0.36 | 0.19  | 0.08  | 0.30 |
| Distance           | -0.02 | -0.05 | 0.00 | 0.00 | -0.01 | 0.01 | 0.00 | -0.01 | 0.01 | 0.00 | -0.02 | 0.03 | -0.01 | -0.02 | 0.01 |
| rho                | 0.42  | 0.09  | 0.69 | 0.92 | 0.88  | 0.95 | 0.75 | 0.65  | 0.84 | 0.83 | 0.74  | 0.90 | 0.77  | 0.65  | 0.87 |
| tau2               | 0.39  | 0.26  | 0.55 | 0.87 | 0.69  | 1.08 | 0.68 | 0.52  | 0.87 | 0.33 | 0.26  | 0.43 | 0.38  | 0.28  | 0.51 |

---

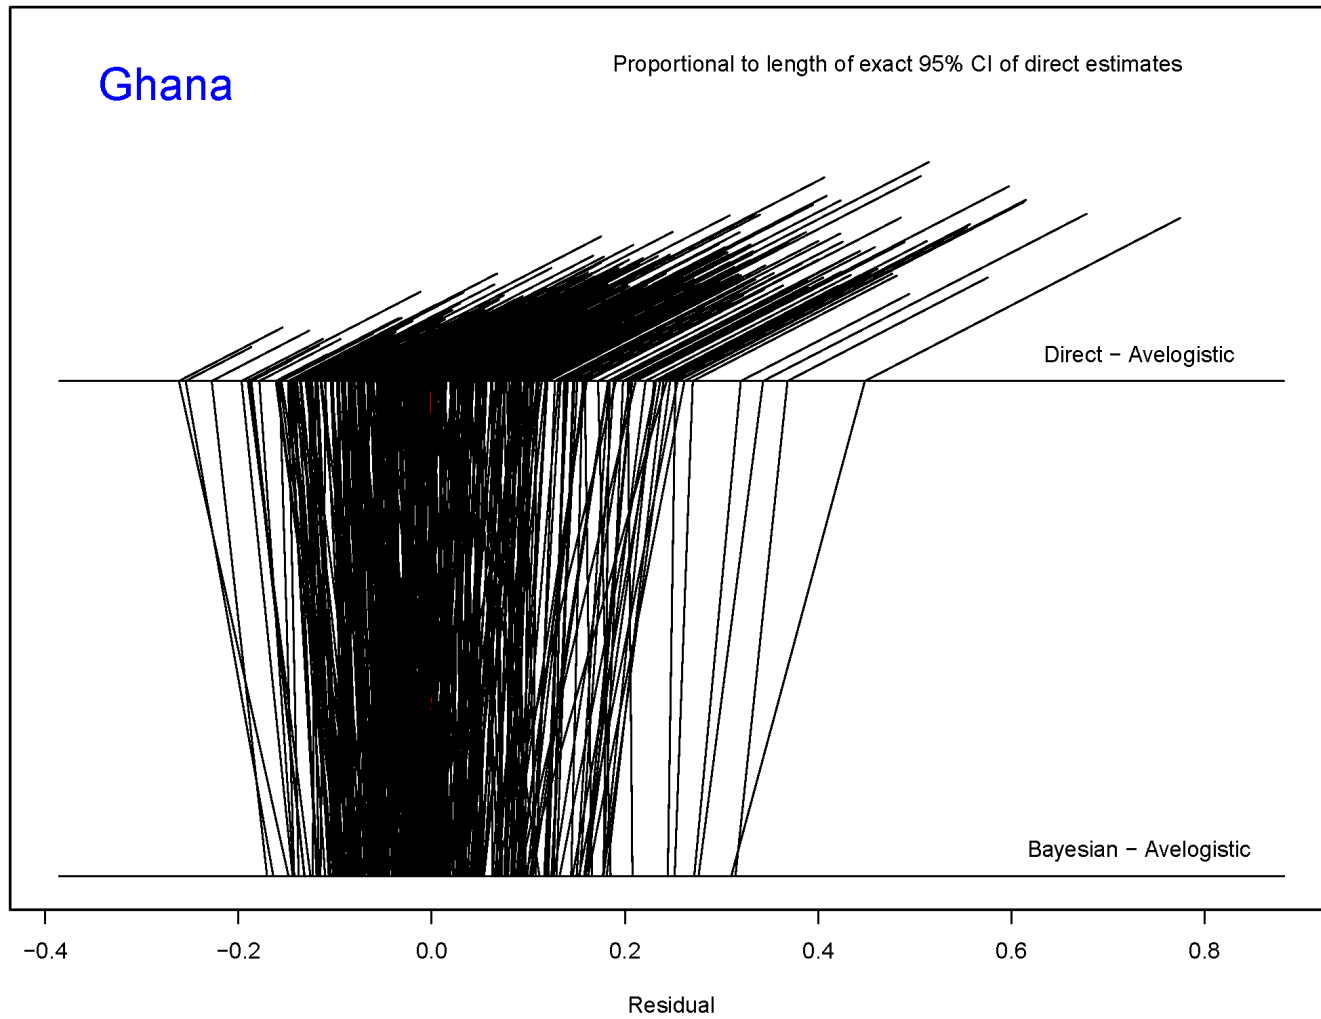

Figure 2a: Residual shrinkage: Ghana round 1-4

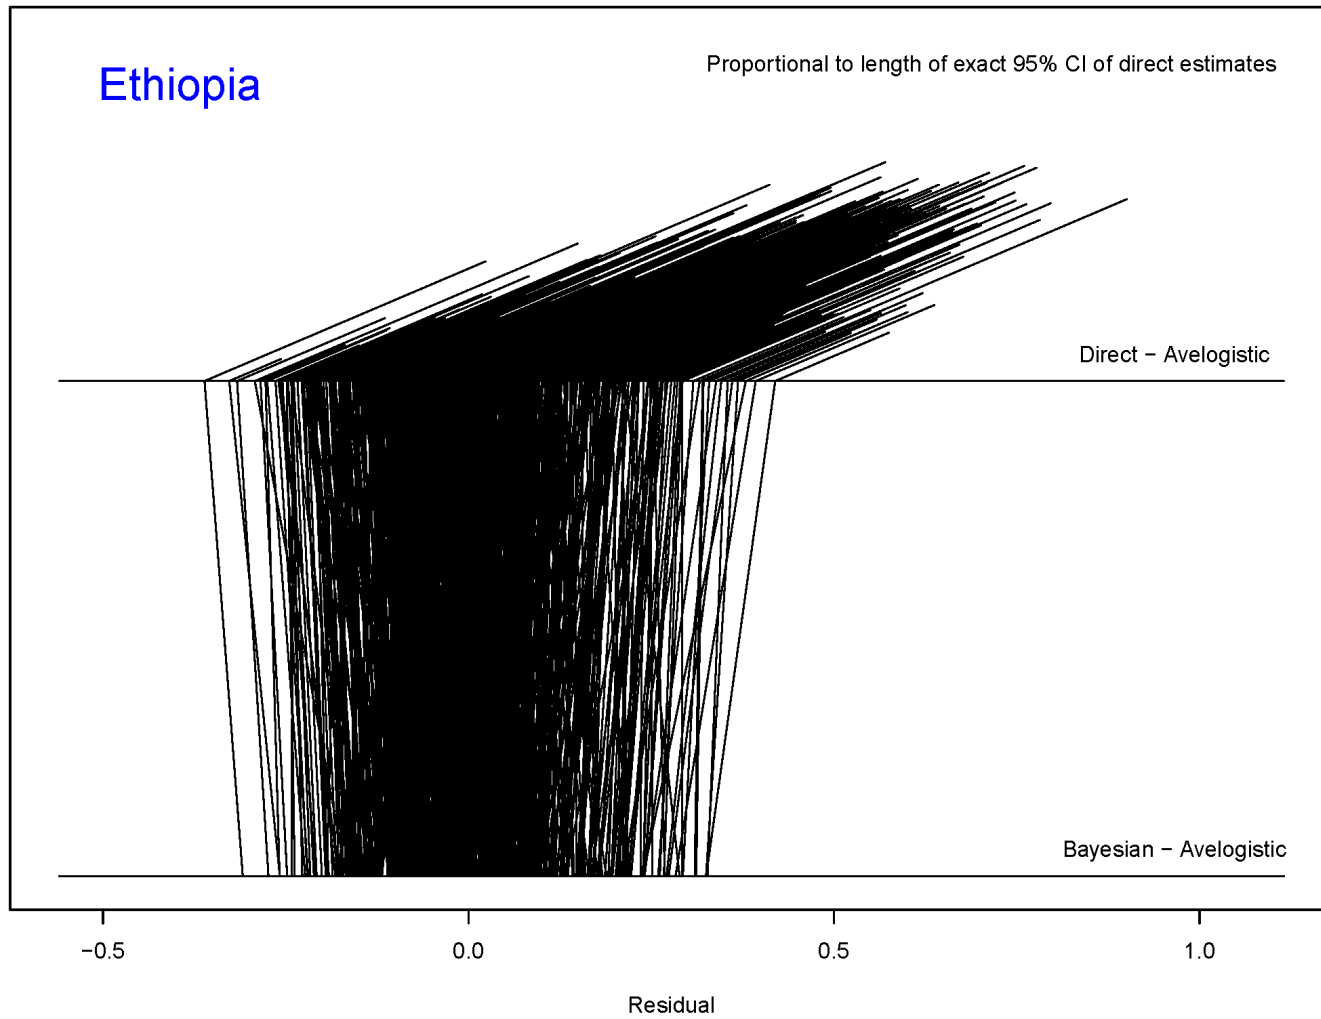

Figure 2b: Residual shrinkage: Ethiopia round 1-4

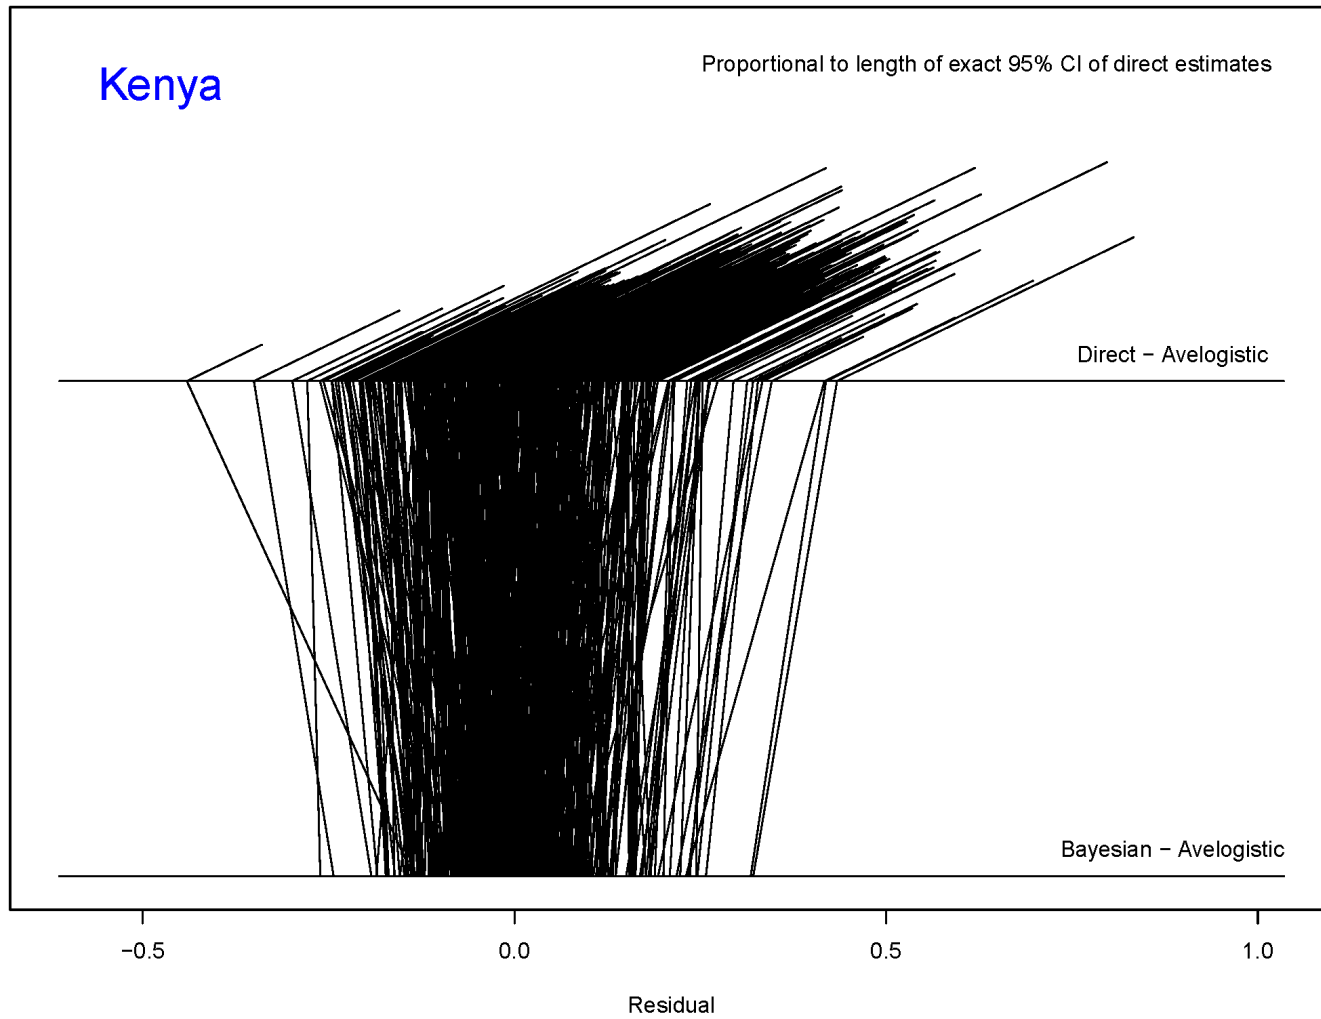

Figure 2c: Residual shrinkage: Kenya round 1-4



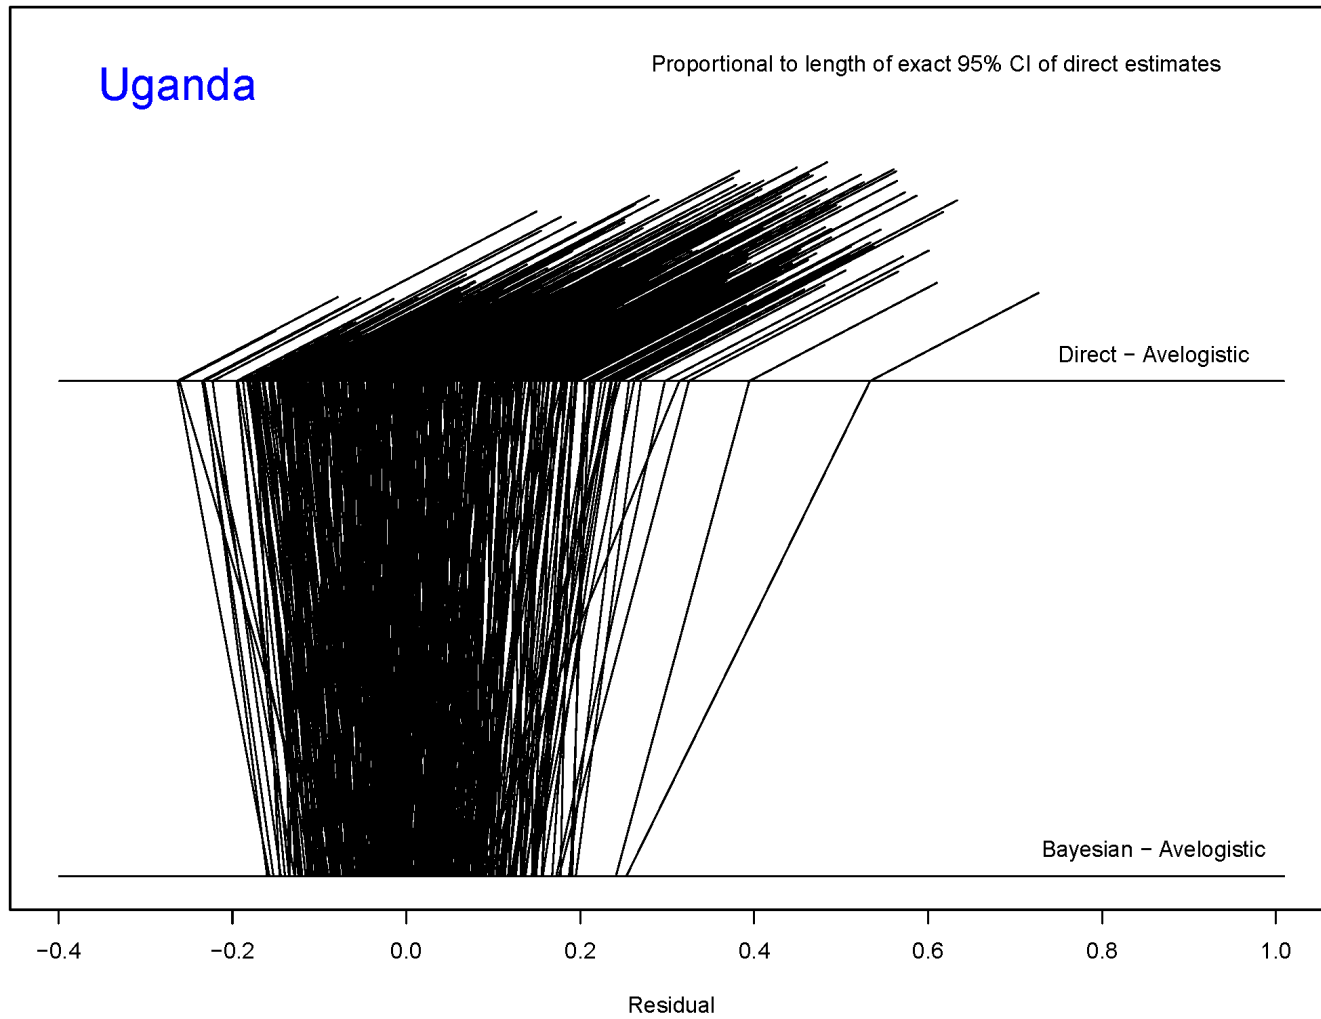

Figure 2d: Residual shrinkage: Uganda round 1-4

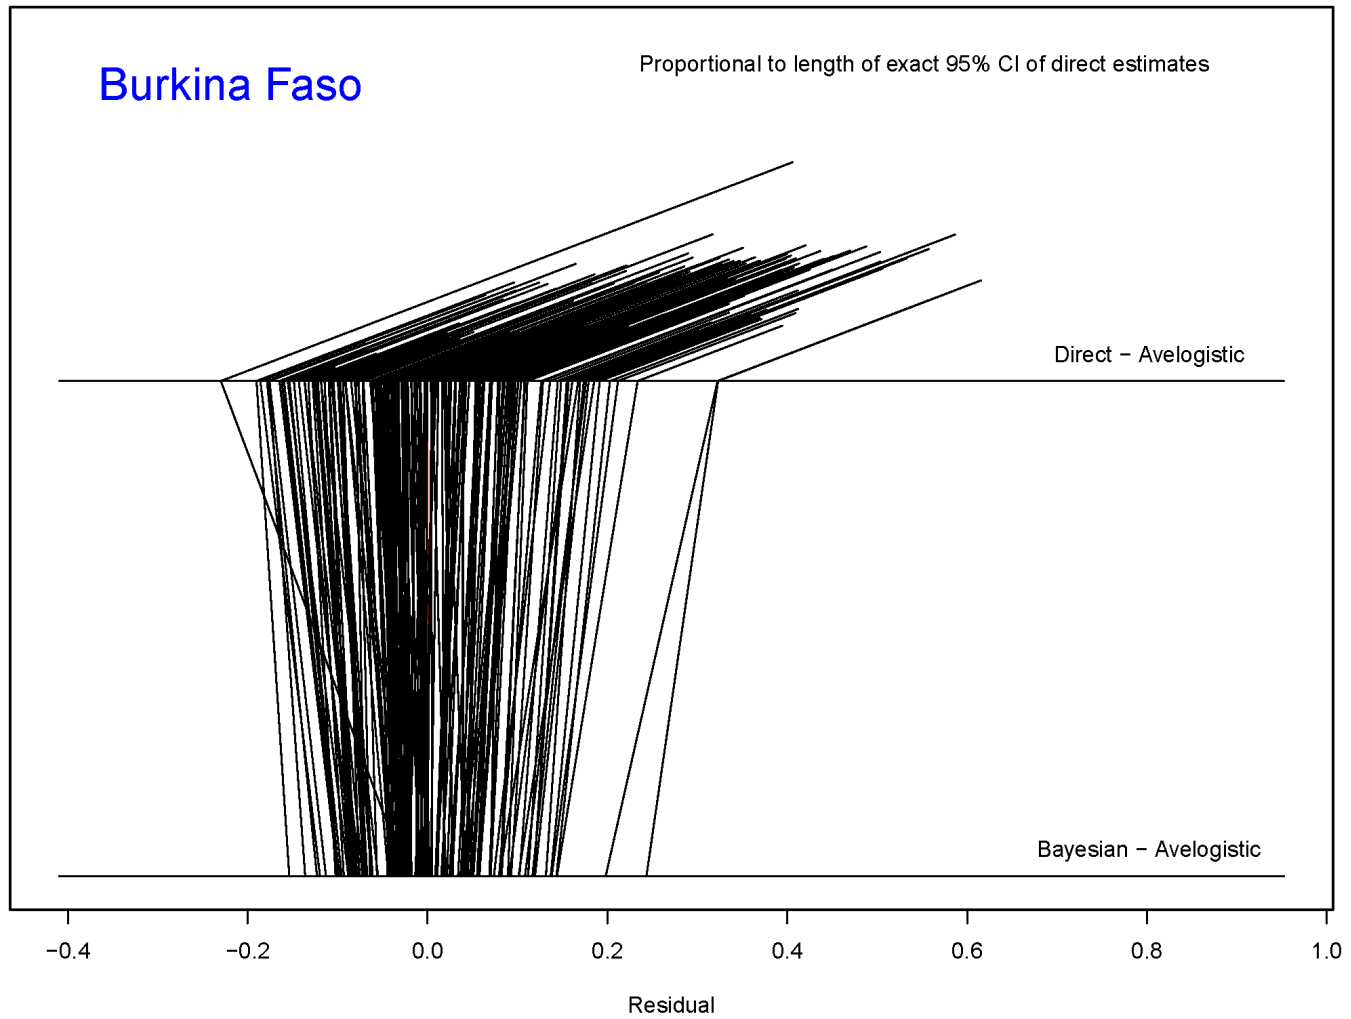

Figure 2e: Residual shrinkage: Burkina Faso round 3-4

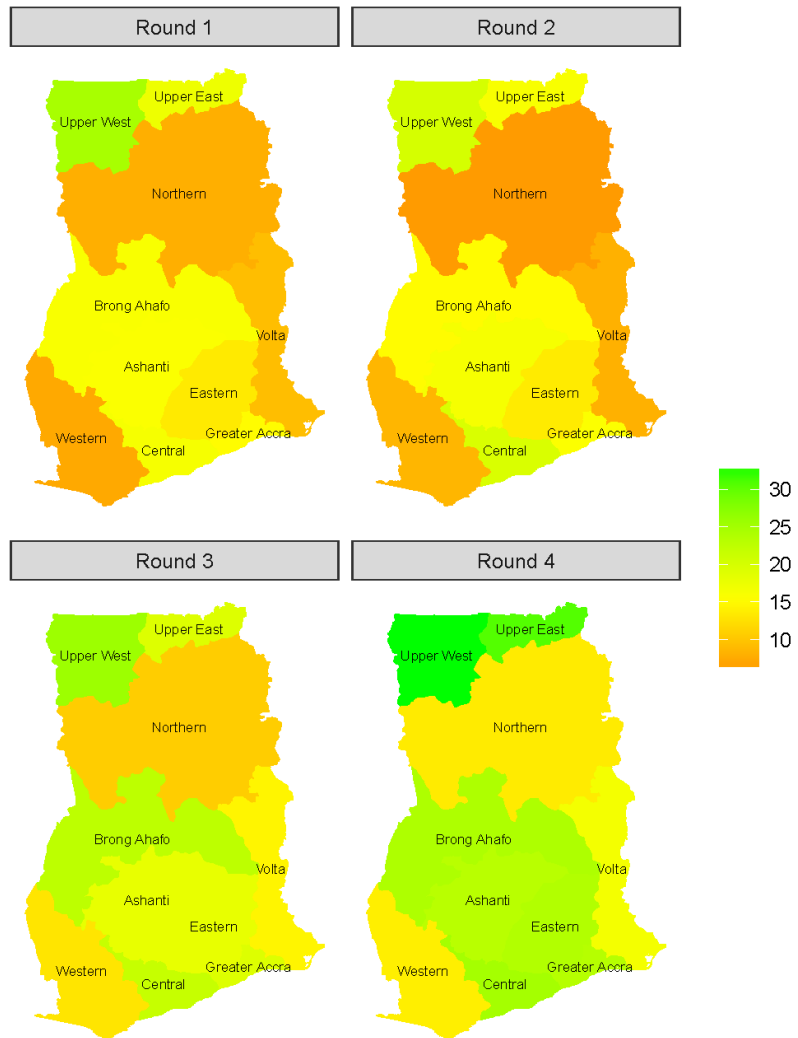

Figure 3a: Temporal and geographic variation in Bayesian estimates over four rounds of PMA2020 survey in Ghana

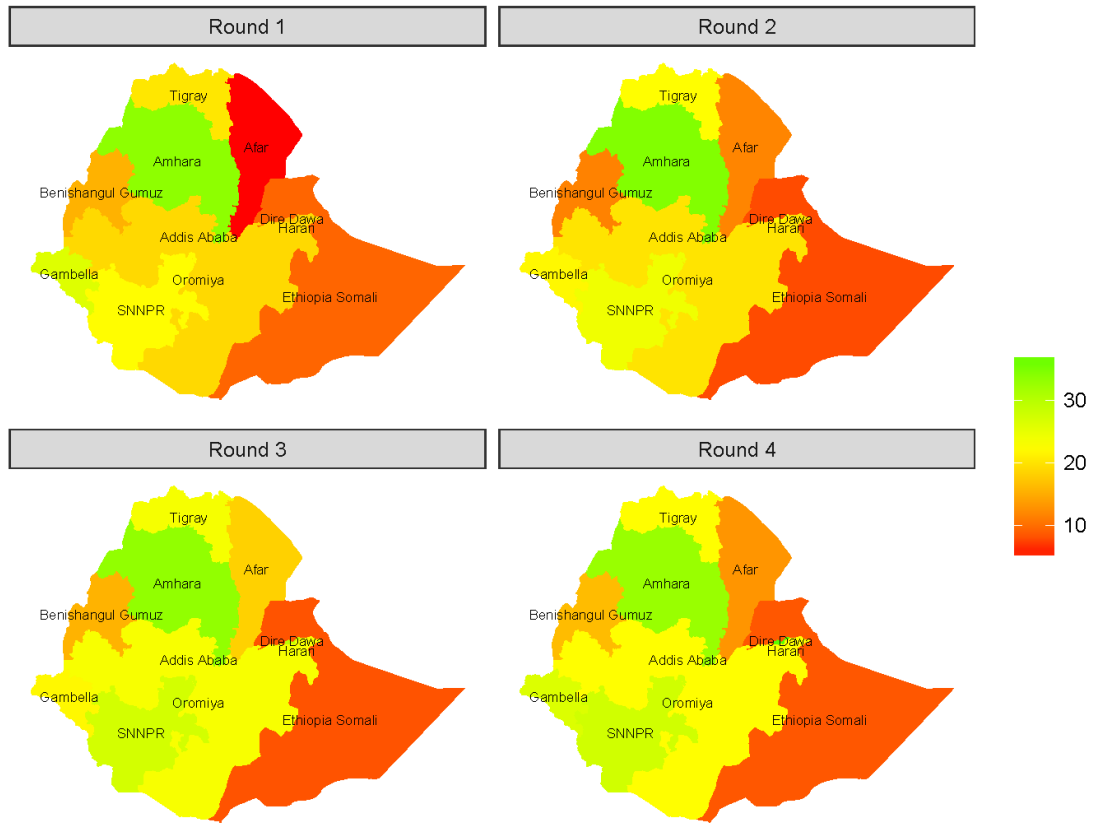

Figure 3b: Temporal and geographic variation in Bayesian estimates over four rounds of PMA2020 survey in Ethiopia

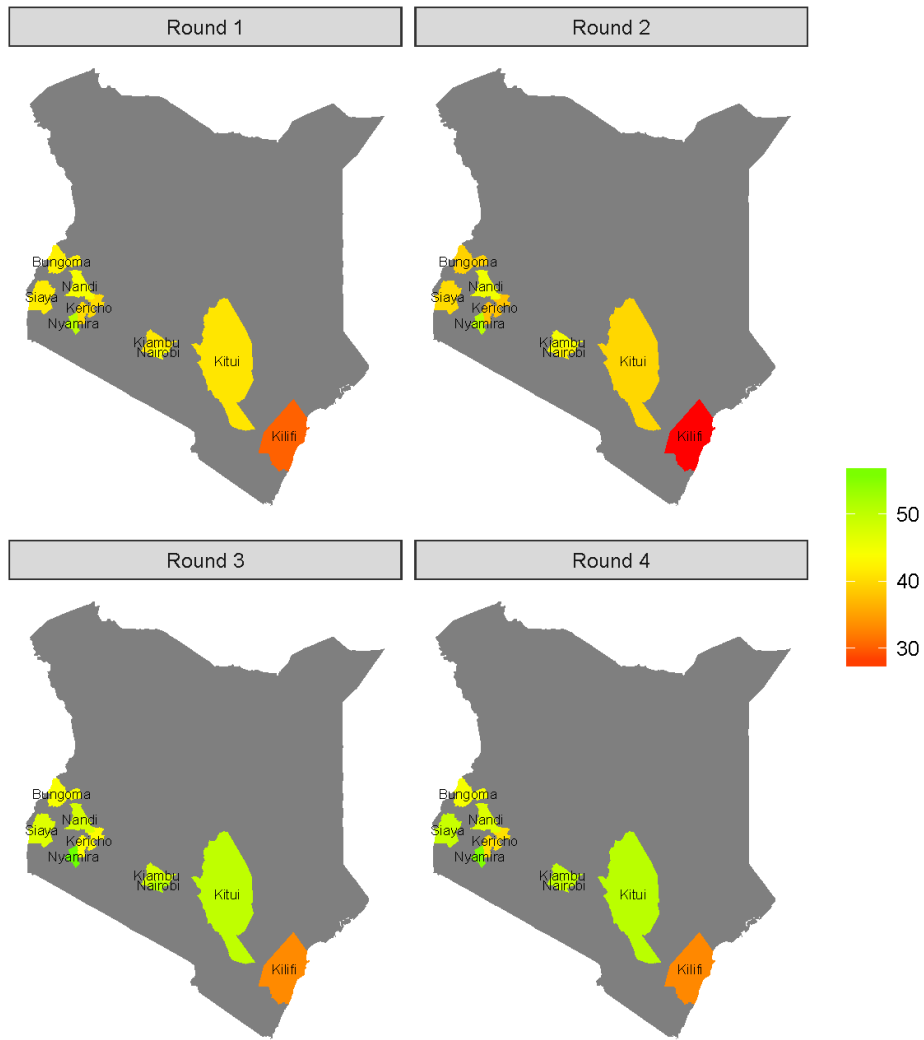

Figure 3c: Temporal and geographic variation in Bayesian estimates over four rounds of PMA2020 survey in Kenya

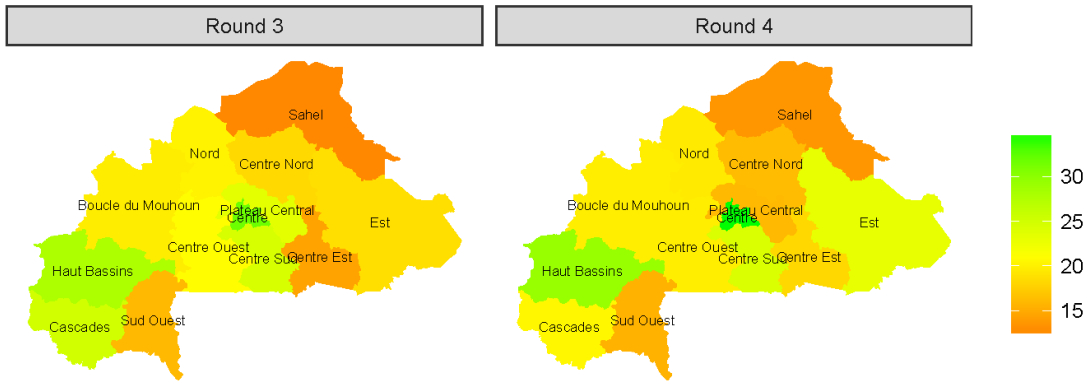

Figure 3d: Temporal and geographic variation in Bayesian estimates over two rounds of PMA2020 survey in Burkina Faso

## References

1. Lloyd CB, Ivanov S. The effects of improved child survival on family planning practice and fertility. *Stud Fam Plann* 1988; **19**(3): 141-61.
2. Chen C, Wakefield J, Lumely T. The use of sampling weights in Bayesian hierarchical models for small area estimation. *Spatial and spatio-temporal epidemiology* 2014; **11**: 33-43.
3. Vandendijck Y, Faes C, Kirby RS, Lawson A, Hens N. Model-based inference for small area estimation with sampling weights. *Spatial Statistics* 2016; **18, Part B**: 455-73.
